## **The NAD<sup>+</sup>-dependent deacetylase Sir2 enables evolution of new traits by regulating distinct gene sets in two yeast species, *Saccharomyces cerevisiae* and *Kluyveromyces lactis***

Kristen M. Humphrey<sup>\*1</sup>, Lisha Zhu<sup>+2</sup>, Meleah A. Hickman<sup>‡3</sup>, Shirin Hasan<sup>‡4</sup>, Haniem Maria<sup>\*</sup>, Tao Liu<sup>+5</sup>, and Laura N. Rusche<sup>\*</sup>

\* Department of Biological Sciences, University at Buffalo State University of New York, Buffalo, NY, 14260

† Department of Biochemistry, University at Buffalo State University of New York, Buffalo, NY, 14203

‡ Department of Biochemistry, Duke University, Durham, NC, 27710

1. Current address: Department of Cancer Genetics & Genomics, Roswell Park Cancer Institute, Buffalo, NY, 14203

2. Current address: School of Biomedical Informatics, University of Texas Health Science Center at Houston, Houston, TX, 77030

3. Current address: Department of Biology, Emory University, Atlanta, GA, 30322

4. Current address: Department of Medicine, Northwestern University School of Medicine, Chicago, IL, 60611

5. Current address: Department of Biostatistics & Bioinformatics, Roswell Park Cancer Institute, Buffalo, NY, 14203

Data available in public repositories: GSE85574, GSE84552, GSE92930, GSE86149, and GSE84403

- 1 **Running Title:** Sir2-regulated genes in two yeast species
- 2 **Key Words:** Sirtuin, Sum1, nicotinamide adenine dinucleotide, sporulation
- 3 **Corresponding author:** Laura Rusche, 109 Cooke Hall, Buffalo, NY 14260, 716-645-5198,
- 4 [lrusche@buffalo.edu](mailto:lrusche@buffalo.edu)

## ABSTRACT

5  
6 Evolutionary adaptation increases the fitness of an organism in its environment. It can occur through  
7 rewiring of gene regulatory networks, such that an organism responds appropriately to environmental  
8 changes. We investigated whether sirtuin deacetylases, which repress transcription and require NAD<sup>+</sup>  
9 for activity, could facilitate the evolution of potentially adaptive responses by serving as transcriptional  
10 rewiring points. If so, bringing genes under the control of sirtuins could enable organisms to mount  
11 appropriate responses to stresses that decrease NAD<sup>+</sup> levels. To explore how the genomic targets of  
12 sirtuins shift over evolutionary time, we compared two yeast species, *Saccharomyces cerevisiae* and  
13 *Kluyveromyces lactis* that display differences in cellular metabolism and lifecycle timing in response to  
14 nutrient availability. We identified sirtuin-regulated genes through a combination of chromatin  
15 immunoprecipitation and RNA expression. In both species, regulated genes were associated with NAD<sup>+</sup>  
16 homeostasis, mating, and sporulation, but the specific genes differed. In addition, regulated genes in *K.*  
17 *lactis* were associated with other processes, including utilization of non-glucose carbon sources, heavy  
18 metal efflux, DNA synthesis, and production of the siderophore pulcherrimin. Consistent with the  
19 species-restricted regulation of these genes, sirtuin deletion impacted relevant phenotypes in *K. lactis*  
20 but not *S. cerevisiae*. Finally, sirtuin-regulated gene sets were depleted for broadly-conserved genes,  
21 consistent with sirtuins regulating processes restricted to a few species. Taken together, these results  
22 are consistent with the notion that sirtuins serve as rewiring points that allow species to evolve distinct  
23 responses to low NAD<sup>+</sup> stress.

24

## INTRODUCTION

25 Evolutionary adaptation is the process by which species acquire traits that make them better suited  
26 to a particular environment. At the molecular level, adaptation can involve the acquisition of new  
27 protein functions or new gene expression patterns (OHNO 1970; KING AND WILSON 1975). In the case of  
28 new gene expression patterns, particular transcriptional regulators might be frequent rewiring points  
29 for such changes. For example, a regulator that responds to a particular stress could be redirected to  
30 new genes to invoke a distinct biological response to that stress. In this study, we explored the  
31 possibility that sirtuin deacetylases are such regulators.

32 Sirtuins are NAD<sup>+</sup>-dependent deacetylases that have been identified in all kingdoms of life (GREISS  
33 AND GARTNER 2009). These enzymes have two characteristics that are consistent with being rewiring  
34 points. First, sirtuins require NAD<sup>+</sup> for activity (IMAI *et al.* 2000) and are therefore proposed to respond  
35 to stresses that impact intracellular NAD<sup>+</sup> levels. In particular, because NAD<sup>+</sup> is a key redox carrier in  
36 central metabolism, changes in metabolic flux due to nutrient perturbations could impact NAD<sup>+</sup>  
37 availability and hence the deacetylase activity of sirtuins. At this time, the conditions that cause low  
38 intracellular NAD<sup>+</sup> in yeast are not well understood. However, there is evidence that intracellular NAD<sup>+</sup>  
39 levels impact Sir2 activity. For example, genetic perturbations of the enzymes and transporters that  
40 maintain intracellular NAD<sup>+</sup> alter Sir2 activity (SMITH *et al.* 2000; ANDERSON *et al.* 2002; BELENKY *et al.*  
41 2007), as does the presence or absence of NAD<sup>+</sup> precursors in the growth medium (BELENKY *et al.* 2007).  
42 Moreover, intracellular NAD<sup>+</sup> is increased in the absence of inositol (LEE *et al.* 2013) and in aging cells  
43 (ASHRAFI *et al.* 2000) and these increases correspond with enhanced Sir2 activity.

44 A second characteristic of sirtuins consistent with being rewiring points is that they have diverged to  
45 deacetylate a wide range of substrates. Some sirtuins, including those examined here, deacetylate



46 histones and are targeted to specific genomic locations where they repress transcription. Thus, these  
47 sirtuins are proposed to connect gene expression to the metabolic state of the cell by sensing NAD<sup>+</sup>  
48 levels. Therefore, species could evolve distinct biological responses to stresses that perturb NAD<sup>+</sup> levels  
49 by bringing new genes under the control of sirtuins. Consistent with this idea, we have observed that in  
50 the *Candida* clade of yeast the genomic targets of sirtuins vary from one species to another (FROYD *et al.*  
51 *al.* 2013; KAPOOR *et al.* 2015; RUPERT *et al.* 2016).

52 To explore how the genes targeted by sirtuins have shifted over evolutionary time, we compared  
53 two genetically tractable yeast species, *Saccharomyces cerevisiae* and *Kluyveromyces lactis*. *S.*  
54 *cerevisiae* Sir2 (ScSir2) deacetylates histone tails (BRAUNSTEIN *et al.* 1993; IMAI *et al.* 2000) and, as part of  
55 a complex with Sir3 and Sir4, forms transcriptionally repressive chromatin at telomeres and the cryptic  
56 mating-type loci (RINE AND HERSKOWITZ 1987; GOTTSCHLING *et al.* 1990). ScSir2 also acts at the tandem  
57 rDNA repeats where it reduces recombination (GOTTLIEB AND ESPOSITO 1989). A paralog of Sir2, Hst1  
58 (Homolog of Sir Two), arose in a whole genome duplication (BYRNE AND WOLFE 2005). ScHst1 acts with  
59 the DNA-binding protein Sum1 to repress mid-sporulation and NAD<sup>+</sup> biosynthetic genes (XIE *et al.* 1999;  
60 BEDALOV *et al.* 2003). We compared the targets of ScSir2 and ScHst1 in *S. cerevisiae* with those of KISir2  
61 in *K. lactis*. This species did not undergo the duplication that led to Sir2 and Hst1. Like ScSir2, KISir2 acts  
62 at the telomeres, cryptic mating-type loci, and rDNA; and like ScHst1, KISir2 acts at mid-sporulation  
63 genes (ASTROM *et al.* 2000; HICKMAN AND RUSCHE 2009).

64 An unresolved question is whether the sets of genes repressed by Sir2 and Hst1 in *S. cerevisiae* and  
65 *K. lactis* differ functionally, enabling each species to respond in a distinct way to low intracellular NAD<sup>+</sup>.  
66 There are several key differences between these species that are connected to cellular metabolism and  
67 nutrient availability. For example, in the presence of oxygen, *S. cerevisiae* processes sugars through  
68 fermentation whereas *K. lactis* favors respiration (KIERS *et al.* 1998). These distinct metabolic strategies

69 might require different responses to low NAD<sup>+</sup> levels. A second difference is the coordination of the  
70 sexual cycle with nutrient availability. Newly germinated *S. cerevisiae* spores, which are haploid, mate  
71 readily in rich nutrients. The resulting diploid cells propagate mitotically until nutrients become scarce,  
72 at which point they undergo meiosis and sporulation. In contrast, newly germinated *K. lactis* spores do  
73 not mate readily but instead propagate in the haploid state until nutrients become scarce (HERMAN AND  
74 ROMAN 1966; BOOTH *et al.* 2010). They then mate and proceed directly to meiosis and sporulation.

75 To determine whether Sir2 and Hst1 regulate distinct genes that would be advantageous for the  
76 different metabolic and life cycle strategies of *S. cerevisiae* and *K. lactis*, we defined the gene sets  
77 regulated by Sir2 and Hst1 in both species. To do so, we used a combination of chromatin  
78 immunoprecipitation and RNA expression analyses. Regulated genes in both species are involved in  
79 NAD<sup>+</sup> homeostasis, mating, and sporulation. However, the specific genes that are regulated differ. In  
80 addition, in *K. lactis*, regulated genes are associated with processes not regulated in *S. cerevisiae*,  
81 including utilization of non-glucose carbon sources, heavy metal efflux, DNA synthesis, and production  
82 of the siderophore pulcherrimin. Consistent with the species-restricted regulation of these genes,  
83 sirtuin deletion impacted relevant phenotypes in *K. lactis* but not *S. cerevisiae*. We also found that the  
84 gene sets regulated by Sir2 and Hst1 are depleted for widely-conserved genes. Taken together, these  
85 results are consistent with the notion that sirtuins can serve as rewiring points that allow species to  
86 evolve distinct responses to low NAD<sup>+</sup> stress.

## MATERIALS AND METHODS

87

### 88 ***Plasmids and yeast strains***

89 Plasmids used in this study are listed in Table S1. The details of construction are provided in the  
90 supplemental materials and methods. Yeast used in this study are listed in Table S2. Most *K. lactis*  
91 strains were derived from Os334 and Os335 (HEINISCH *et al.* 2010), which are congenic with the type  
92 strain CBS2359. *S. cerevisiae* strains were derived from the laboratory strain W303-1b. The details of  
93 strain construction are provided in the supplemental materials and methods.

94

### 95 ***Yeast growth and transformation***

96 Yeast were grown at 30° in YPD (1% yeast extract, 2% peptone, 2% glucose) unless otherwise stated.  
97 *S. cerevisiae* cells were transformed using the PEG-LiOAc method (SCHIELTL AND GIETZ 1989), and *K. lactis*  
98 cells were transformed by electroporation (HICKMAN AND RUSCHE 2009).

99 To follow growth in various carbon sources, cultures were grown in YM (0.67% yeast nitrogen base  
100 without amino acids) with the desired carbon source (2% glucose or 3% glycerol). For *S. cerevisiae*, YM  
101 was supplemented with histidine, leucine, lysine, and tryptophan. Overnight (glucose) or three-day  
102 (glycerol) cultures were diluted 50% in the same medium and grown an additional 3 hours at 30°. Cells  
103 were then diluted to OD 0.05 and placed in a 96-well clear-bottom plate containing YM supplemented  
104 with the desired carbon source. The OD<sub>600</sub> of each culture was recorded at consistent time intervals at  
105 30° on a SpectraMax i3x microplate reader using the SoftMaxPro 6.5.1 software. To follow growth in  
106 HU or sodium arsenate, cells were grown overnight in YPD, diluted to OD = 0.3, and allowed to grow 4  
107 hours at 30°. Cells were then diluted to OD = 0.05 in different concentrations of HU or sodium  
108 arsenate, and the growth was recorded as described above. To assess pulcherrimin production, cells

109 grown overnight in YPD, diluted to  $OD_{600} = 0.3$  in YPD, and grown four hours. Cells were collected,  
110 washed, and re-suspended in PBS at 1 OD/ml. 10 $\mu$ L of cells were spotted onto YPD plates  
111 supplemented with 3.7 mM FeCl<sub>3</sub>·6H<sub>2</sub>O. The plates were incubated two days and imaged.

112

### 113 **RNA isolation and sequencing**

114 For sequencing, RNA was isolated from *S. cerevisiae* strains LRY3093 and 3099 and *K. lactis* strains  
115 LRY2835, 2849, and 2850 (2012 data set) or LRY2835, 2850, 3096, and 3098 (2016 data set) as  
116 previously described (SCHMITT *et al.* 1990). Cells were grown in YPD and harvested in mid-log phase at  
117  $OD_{600}$  about 1. DNA was removed from 10  $\mu$ g RNA using Turbo DNase (Life Technologies), according to  
118 the manufacturer's instructions. One set of *K. lactis* RNA samples was processed for sequencing using  
119 the TruSeq non-stranded RNA Library Prep Kit (Illumina), and 50 bp single end sequencing was  
120 performed on an Illumina HiSeq2000 machine at the Duke IGSP sequencing facility. A second set of *K.*  
121 *lactis* samples and the *S. cerevisiae* samples were processed at the University at Buffalo Genomics and  
122 Sequencing Core facility and sequenced on an Illumina HiSeq2500.

123

### 124 **Chromatin IP and processing for microarray or sequencing**

125 For the ChIP-Seq experiment from *S. cerevisiae*, ScSir2-HA was immunoprecipitated from LRY1926,  
126 ScHst1-HA was immunoprecipitated from LRY558, and LRY1009 was used for mock IP and input DNA.  
127 Chromatin IP and processing is described in the supplemental methods. Library preparation and  
128 sample barcoding was done at the Next-Generation Sequencing facility at University at Buffalo. The  
129 samples were then sequenced on an Illumina HiSeq2500 using 50 bp single-end sequencing.

130 For the ChIP on Chip experiment, KISir2-HA was immunoprecipitated from strains LRY2021 or  
131 LRY2022. For LRY2021, the IP sample was labeled with Cy5 and the input was labeled with Cy3. For  
132 LRY2022, the dyes were swapped. Labeled DNA was hybridized to a custom ChIP-on-Chip 2x105K  
133 microarray (Agilent G4498A), designed with 102,839 60-nucleotide probes tiled across the *K. lactis*  
134 genome spaced approximately every 100 bp (AMADID 018357). Chromatin IP was conducted as  
135 previously described (HICKMAN AND RUSCHE 2009) and processed as described in the supplemental  
136 methods.

137

### 138 **Bioinformatic analysis**

139 ChIP-Seq reads of ScSir2 and ScHst1 were mapped to the *S. cerevisiae* reference genome  
140 downloaded from SGD database (<http://www.yeastgenome.org/strain/S288C/overview>) using BWA  
141 v0.7.7-r441 (LI AND DURBIN 2009). For calling enriched peak regions, MACS2 v 2.0.10 (ZHANG *et al.* 2008)  
142 was used with genomic input as control, and the parameters used were “-B --nomodel --extsize 200 -q  
143 0.01 -g 12157105”. This analysis identified 159 ScSir2 peaks and 692 ScHst1 peaks. Genes associated  
144 with these peaks were defined as those for which the gene body intersected with a peak in addition to  
145 those for which the start codon was within 1 kbp of a KISir2 peak.

146 ChIP-on-chip signals were mapped to the *K. lactis* reference genome  
147 (<https://www.ncbi.nlm.nih.gov/genome/?term=txid28985%5Borgn%5D>), and KISir2 binding sites were  
148 called using MA2C software (SONG *et al.* 2007). The normalization method was set as “Robust,” the FDR  
149 (False Discovery Rate) cutoff for ChIP-enriched regions was 0.05, the BANDWIDTH was set to 500 bp,  
150 the number of MIN\_PROBES was 5, and the MAX\_GAP was set as 250 bp. This analysis identified 460

151 KISir2 peaks. Genes associated with these peaks were defined using the same criteria as for *S.*  
152 *cerevisiae*.

153 For RNA-Seq, the raw reads from single-end sequencing were mapped to the *K. lactis* and *S.*  
154 *cerevisiae* reference genomes, allowing no more than 2 mismatches, using tophat v2.0.10 (KIM *et al.*  
155 2013). FPKM (Fragments Per Kb per Million reads) were obtained using cufflinks version 2.2.1 (TRAPNELL  
156 *et al.* 2013) and count data were obtained using HTSeq-count (ANDERS *et al.* 2015) with alignment  
157 quality cutoff set to 10. The gene annotation file for *K. lactis* was obtained from Genolevures database  
158 (<http://genolevures.org/index.html#>) and for *S. cerevisiae* was obtained from Ensembl database  
159 ([http://ftp.ensembl.org/pub/release-66/gtf/saccharomyces\\_cerevisiae/](http://ftp.ensembl.org/pub/release-66/gtf/saccharomyces_cerevisiae/)). edgeR (ROBINSON *et al.* 2010)  
160 was applied to detect genes differentially expressed between wild-type and knockout strains, with FDR  
161 cutoff of 0.05 and the absolute fold-change larger than or equal to 2.

162 To identify *S. cerevisiae* orthologs of *K. lactis* genes, each *K. lactis* gene served as a BLASTP query,  
163 and the top *S. cerevisiae* hits ( $\geq 70\%$  of the maximum score for that search) were identified. Next, these  
164 *S. cerevisiae* genes were used as queries, and the top *K. lactis* hits were identified. If the second BLASTP  
165 search returned to the starting *K. lactis* gene, the genes from the two species were concluded to be  
166 orthologs. In some cases, the BLASTP search identified a multi-gene family or two paralogs that arose  
167 through duplication in the *S. cerevisiae* lineage. These genes were all taken as orthologs. Most of the  
168 ortholog assignments were consistent with the Yeast Gene Order Browser (BYRNE AND WOLFE 2005),  
169 which considers gene order as well as homology. After manual refinement, including the use of gene  
170 order to assign orthologs to some short, rapidly evolving genes, we identified *S. cerevisiae* orthologs  
171 for 109 of the 175 KISir2-regulated genes (Table S7).

172

173 **Mating assays**

174 For *S. cerevisiae* mating assays, cells of both mating types were grown separately overnight in YPD at  
175 30° with shaking. Cultures were diluted by 50% in YPD and incubated for 3 hours, spun down, and  
176 resuspended at 10 OD/mL in YPD. A lawn was prepared using 200µL (2 OD of cells) of one mating-type  
177 spread on YM plates supplemented with histidine, tryptophan, and leucine. The other stain was then  
178 used to make five 10-fold serial dilutions. 200µL of the most dilute culture ( $2 \times 10^{-5}$  OD) was spread on  
179 YPD plates to determine the number of viable cells and over the lawn to determine the number of cells  
180 that could mate. Three mating lawns and one YPD plates were counted for each mating combination.

181 For *K. lactis* mating assays, *MAT $\alpha$*  cells expressed mCherry, and *MAT $\alpha$*  cells expressed yEGFP. Cells of  
182 both mating types were co-cultured on malt extract (5% malt extract and 3% agar) for three days at  
183 30°. Cells were resuspended in 500 µL of sterile distilled water and then sonicated using a soniprep 150  
184 sonicator for 5 seconds at an amplitude of 5 microns. Finally, cells were examined using ImageStream  
185 cytometry (ImageStream Mark II Imaging flow cytometer, EMD Millipore) with the following settings:  
186 488nm laser at 100 watts, 561nm laser at 150 watts, 60X amplification. Images were collected for  
187 brightfield in channels 1 and 9, side scatter in channel 6, yEGFP in channel 2, and mCherry in channel 4.  
188 100,000 events were collected for each sample. IDEAS software (EMD Millipore) was used to identify  
189 cells which were in focus and showed both red and green fluorescence. Each of these events were  
190 manually examined for an hourglass appearance typical of zygotes.

191

192 **Sporulation assay**

193 Diploid cells were freshly grown from frozen glycerol stocks. After overnight growth on YPD plates,  
194 cells were patched onto KOAc plates (1% KOAc and 3% agar) and incubated at 30°. At two hour

195 intervals, cells were resuspended in sterile distilled water, vortexed, and examined under a light  
196 microscope. All cells in three fields of vision were scored as either having sporulated (tetrad  
197 morphology) or not. The experiment was conducted twice with four biological replicates (diploid  
198 strains) each time.

199

#### 200 ***Data and reagent availability statement***

201 Strains and plasmids are available upon request. Gene expression data are available at GEO with the  
202 accession numbers: GSE92930, GSE86149, and GSE84403. ChIP-Seq data are available at GEO with the  
203 accession number GSE84552. ChIP-on-Chip data are available at GEO with the accession number:  
204 GSE85574.

205 Table S1 lists plasmids used in this study. Table S2 lists yeast strains used in this study. Table S3  
206 contains RNA-Seq and ChIP-Seq data for all annotated *S. cerevisiae* genes. Table S4 contains RNA-Seq  
207 and ChIP-Chip data for all annotated *K. lactis* genes. Table S5 contains descriptions and comparative  
208 information for ScSir2-regulated genes. Table S6 contains descriptions and comparative information for  
209 ScHst1-regulated genes. Table S7 contains descriptions and comparative information for KISir2-  
210 regulated genes identified based on 2016 RNA-Seq data. Table S8 contains descriptions and  
211 comparative information for KISir2-regulated genes identified based on 2012 RNA-Seq data. Table S9 is  
212 the basis for figure 3. It includes RNA-Seq and ChIP data for the genes known to act in each pathway  
213 represented in the figure.



214

## RESULTS

### 215 ***Identification of genes regulated by ScSir2, ScHst1, and KISir2***

216 To identify the genes regulated by Sir2 and Hst1 in *S. cerevisiae* and *K. lactis*, we combined data  
217 from two experiments for each species. First, we mapped genomic loci associated with Sir2 or Hst1  
218 using chromatin immunoprecipitation (ChIP). For *S. cerevisiae*, ChIP DNA was sequenced using high-  
219 throughput Illumina technology (ChIP-Seq). For *K. lactis*, ChIP DNA was hybridized to a tiled microarray  
220 (ChIP-chip). Next, we identified the genes whose transcription is influenced by Sir2 or Hst1 using  
221 Illumina sequencing of RNA (RNA-Seq). For this experiment, the cryptic mating-type loci were deleted  
222 so that loss of Sir2 would not lead to simultaneous expression of  $\alpha$  and  $\alpha'$  transcription factors, a  
223 condition that specifies the diploid state and causes significant changes in gene expression. In *S.*  
224 *cerevisiae*, both *SIR2* and *HST1* were deleted in the same strain because these paralogs are known to  
225 substitute for one another (XIE *et al.* 1999; HICKMAN AND RUSCHE 2007). Genes directly regulated by Sir2  
226 or Hst1 were defined as those that were associated with the deacetylase in the ChIP assay and  
227 increased at least twofold in the deletion strain compared to wild type.

228 In *S. cerevisiae*, 171 genes increased significantly in the *sir2Δ hst1Δ* strain. ScHst1 associated with  
229 974 genes, of which 115 were significantly up-regulated in the *sir2Δ hst1Δ* strain (Figure 1A). Therefore,  
230 these 115 genes were identified as being directly regulated by ScHst1. Similarly, ScSir2 associated with  
231 a total of 176 genes, of which 10 also increased in expression and were thus identified as ScSir2-  
232 regulated (Figure 1B). In *K. lactis*, 1,159 genes were associated with KISir2, and 255 genes increased in  
233 expression in the *sir2Δ* strain. 175 of these genes had both properties and were thus determined to be  
234 directly regulated by KISir2 (Figure 1C). Most (153) of these 175 KISir2-regulated genes were also  
235 upregulated in a separate *K. lactis* RNA-Seq dataset that was collected several years earlier (Figure S1).

236 Unless otherwise noted, we focused on the 175 KISir2-regulated genes (Figure 1C) that were identified  
237 based on the RNA-Seq conducted at the same time as the *S. cerevisiae* RNA-Seq. The CHIP and  
238 expression data for all annotated genes in both species are provided in Tables S3 and S4.

239 ScSir2, ScHst1, and KISir2 are all expected to repress transcription based on their deacetylase  
240 activity and previously described functions (RINE AND HERSKOWITZ 1987; XIE *et al.* 1999; HICKMAN AND  
241 RUSCHE 2009). Consistent with this expectation, genes associated with these deacetylases were more  
242 likely to be up-regulated than down-regulated in the absence of the deacetylase (Figure 1A-C). Indeed,  
243 in *S. cerevisiae* only one down-regulated gene was associated with ScHst1, and none were associated  
244 with ScSir2. However, in *K. lactis* 13 down-regulated genes were associated with KISir2 (Figure 1C). To  
245 test statistically whether these genes are simply near KISir2 peaks by chance or could be  
246 transcriptionally activated by KISir2, we performed a Fisher's exact test. We found a strong correlation  
247 between up-regulated genes and KISir2 peaks ( $p < 2.2 \times 10^{-16}$ ). In contrast, the correlation was less  
248 significant for down-regulated genes ( $p = 0.049$ ). Therefore, KISir2 functions primarily as a  
249 transcriptional repressor.

250

### 251 ***Genes regulated by ScSir2 were adjacent to cryptic mating-type loci or telomeres***

252 ScSir2 is thought to act primarily, if not exclusively, at the cryptic mating-type loci and telomeres  
253 (MARCHFELDER *et al.* 2003; ELLAHI *et al.* 2015). Consistent with this expectation, all but one of the ten  
254 genes we identified as ScSir2-regulated was near these loci (Table S5). Six genes were within 10 Kb of a  
255 telomere, and three genes were adjacent to the cryptic mating-type locus *HML*. No genes near *HMR*  
256 could be identified as ScSir2-repressed because *HMR* was deleted in the strains used for RNA-Seq.  
257 However, ScSir2 was associated with *HMR* in our CHIP-Seq study. The one ScSir2-regulated gene that

258 was not near telomeres or mating-type loci was *YAT1*. This gene was also associated with ScHst1, and  
259 thus it is not clear which of these deacetylases is the primary regulator. We note that seven of the ten  
260 ScSir2-regulated genes were previously identified as being repressed by the Sir proteins (ELLAHI *et al.*  
261 2015). We surveyed the functions of the ten ScSir2-regulated genes, but observed no common  
262 functional categories. We also compared the genome-wide distribution of ScSir2 observed in this study  
263 with data collected by two other labs. In agreement with (THURTLER AND RINE 2014), we found that ScSir2  
264 is focused at telomeres and mating-type loci. In contrast, Sir2 was not associated with highly expressed  
265 genes (Figure S2), as reported (LI *et al.* 2013). We note that the ChIP-seq data that led to this  
266 conclusion had a low signal-to-noise ratio and many of the genes identified may represent a known  
267 “hyper-ChIP” artifact (TEYTELMAN *et al.* 2013). Therefore, our data support the previous understanding  
268 that ScSir2 performs a structural role at chromosome ends and maintains repression at the cryptic  
269 mating-type loci but does not regulate the expression of many genes. Consequently, perturbation of  
270 ScSir2 activity in low NAD<sup>+</sup> is not expected to cause dramatic changes in gene expression.

271

272 ***Genes regulated by ScHst1 function in the sexual cycle, NAD<sup>+</sup> homeostasis, and scavenging for***  
273 ***nutrients***

274 In contrast to ScSir2-regulated genes, ScHst1-regulated genes were distributed throughout the  
275 genome. ScHst1 is known to repress genes involved in NAD<sup>+</sup> biosynthesis and sporulation (XIE *et al.*  
276 1999; BEDALOV *et al.* 2003), and indeed, these genes were well-represented among our 115 ScHst1-  
277 regulated genes (Figure 1E; Table S6). In particular, our list included five genes required for *de novo*  
278 synthesis of NAD<sup>+</sup> and two that encode transporters of NAD<sup>+</sup> precursors. It also included 43 genes  
279 involved in sporulation, most of which contribute to formation of the pro-spore membrane or spore

280 wall. Moreover, 76 of the 115 genes (66%) are induced during sporulation (FRIEDLANDER *et al.* 2006;  
281 BORDE *et al.* 2009). Our data are consistent with previous studies, as 84 of our ScHst1-regulated genes  
282 (73%) were previously reported to be regulated by Hst1 or its DNA-binding partner Sum1 (BEDALOV *et*  
283 *al.* 2003; McCORD *et al.* 2003).

284 We also observed additional groups of functionally-related genes that are regulated by ScHst1. For  
285 example, six genes are involved in cell fusion during mating and are associated with the shmoo tip, four  
286 genes encode hexose transporters, two genes are involved in allantoin degradation, two genes are  
287 involved in thiamine biosynthesis (LI *et al.* 2010), and two genes are involved in pyridoxine  
288 biosynthesis. Thus, when low NAD<sup>+</sup> triggers the induction of ScHst1-regulated genes, *S. cerevisiae*  
289 responds by increasing the synthesis of NAD<sup>+</sup> and other co-factors, scavenging for nutrients, and  
290 inducing genes required for mating and sporulation.

291

### 292 ***Genes regulated by KISir2 have additional functions not observed in S. cerevisiae***

293 The functions of most KISir2-regulated genes had to be inferred from their *S. cerevisiae* orthologs  
294 because few of these genes have been studied experimentally in *K. lactis*. We found that KISir2-  
295 regulated genes have similar functions to ScHst1-regulated genes. In particular, two genes are involved  
296 in NAD<sup>+</sup> homeostasis, 36 genes are involved in sporulation, nine genes are involved in mating, two  
297 genes are involved in allantoin metabolism, one gene is involved in thiamine biosynthesis, and one  
298 gene is involved in pyridoxine biosynthesis (Table S7). Thus, Sir2 has continued to regulate these  
299 biological processes over evolutionary time. However, we also found that a number of KISir2-regulated  
300 genes were functionally distinct from ScHst1-regulated genes (Figure 1E). For example, KISir2 regulates  
301 ten genes involved in metabolizing non-glucose carbon sources, four genes involved in DNA synthesis,

302 and seven stress-response genes that mitigate the effects of heavy metals, oxidative stress, and DNA  
303 damage. Thus, when low NAD<sup>+</sup> triggers the induction of KISir2-regulated genes, *K. lactis* not only  
304 responds by increasing the level of NAD<sup>+</sup> and by facilitating mating and sporulation, but it also mounts  
305 responses that buffer against stresses.

306 In *K. lactis*, the non-duplicated KISir2 displays properties similar to both of its *S. cerevisiae* paralogs  
307 ScSir2 and ScHst1 (HICKMAN AND RUSCHE 2009). Therefore, we determined whether KISir2-regulated  
308 genes are repressed in a manner similar to ScSir2, which acts with Sir4, or ScHst1, which acts with  
309 Sum1. Of the 175 KISir2-regulated genes, 148 (84%) are repressed through a ScHst1-like mechanism,  
310 based on their increase in expression in the absence of KISum1 (Table S7). However, only four are  
311 repressed by a ScSir2-like mechanism based on their increase in expression in the absence of KISir4.  
312 Moreover, expression of KISir2-regulated genes was correlated in *sir2Δ* and *sum1Δ* cells but not in *sir2Δ*  
313 and *sir4Δ* cells (Figure S3). Therefore, most KISir2-regulated genes are regulated by the SUM1 complex,  
314 indicating that it is appropriate to compare these genes with those regulated by ScHst1.

315

### 316 ***There was not much overlap between the gene sets regulated by ScHst1 and KISir2***

317 Given the functional overlap between the gene sets regulated by ScHst1 and KISir2, it might be  
318 expected that the same genes in these functional categories would be regulated by these deacetylases  
319 in both species. However, only 29 genes were regulated in both species (Figure 1D), representing  
320 16.5% of KISir2-regulated genes and 24% of ScHst1-regulated genes. These genes included 17 genes  
321 involved in sporulation, one gene involved in mating, and one gene involved in NAD<sup>+</sup> homeostasis.  
322 Thus, many of these common genes do participate in the biological processes that are regulated in  
323 both species. Nevertheless, many other genes associated with these processes are only regulated by

324 Sir2 or Hst1 in one of the two species. This finding is consistent with a model in which the targets of the  
325 SUM1 complex shift over evolutionary time.

326

### 327 ***ScHst1 and KISir2 regulate NAD<sup>+</sup> homeostasis through different genes***

328 The regulation of NAD<sup>+</sup> biosynthesis by ScHst1 has been described as a feedback loop (BEDALOV *et al.*  
329 2003). In particular, a drop in intracellular NAD<sup>+</sup> levels would reduce the activity of the NAD<sup>+</sup>-  
330 dependent deacetylase ScHst1, relieving its repression of genes that boost NAD<sup>+</sup> levels. These genes  
331 include those involved in *de novo* NAD<sup>+</sup> biosynthesis (*BNA* genes) and the import of NAD<sup>+</sup> precursors  
332 (*TNA1* and *NRT1*). We also observed that these genes are regulated by ScHst1, and we found that a  
333 similar feedback loop exists for KISir2 (Figure 2, Tables S6 and S7). However, only one gene, the  
334 transporter *TNA1*, was regulated in both species. *K. lactis* lacks the genes for *de novo* biosynthesis,  
335 precluding them from regulation by KISir2. In addition, *K. lactis* lacks a unique transporter for the NAD<sup>+</sup>  
336 precursor nicotinamide riboside. A single *K. lactis* gene, KLLA0D00550g, is related to three paralogous  
337 *S. cerevisiae* transporters, including the nicotinamide riboside transporter *NRT1* and two thiamine  
338 transporters. This arrangement may account for KISir2 instead regulating enzymes that process NAD<sup>+</sup>  
339 precursors. In summary, both species use an NAD<sup>+</sup>-dependent deacetylase as part of a feedback  
340 mechanism to maintain NAD<sup>+</sup> levels, but the particular genes involved in this circuit are different. This  
341 finding suggests that even though the specific targets of Sir2 have shifted over evolutionary time, it has  
342 maintained regulation of NAD<sup>+</sup> homeostasis. This finding also supports the notion that Sir2 and Hst1  
343 are sensors that tune gene expression in response to fluctuations in intracellular NAD<sup>+</sup> levels.

344

### 345 ***KISir2 regulates genes involved in utilization of carbon sources other than glucose***

346 We observed that genes involved in carbon metabolism were regulated by both ScHst1 and KISir2  
347 (Figure 3, Tables S6-S8). Many of these genes facilitate growth in the absence of glucose. For example,  
348 some genes metabolize sugars other than glucose, such as galactose or lactose. Other genes  
349 metabolize non-sugars such ethanol, glycerol, fatty acids, or amino acids. We also observed regulation  
350 of genes involved in the TCA cycle and the related glyoxylate and methyl citrate cycles. The TCA cycle is  
351 required for aerobic respiration and is an alternative to fermentation, the preferred way for *S.*  
352 *cerevisiae* to process glucose. The methylcitrate cycle is a variation of the TCA cycle in which the three-  
353 carbon compound propionyl-CoA is metabolized in place of the two-carbon compound acetyl-CoA. This  
354 cycle enables metabolism of propionate and fatty acids with odd numbers of carbons. The glyoxylate  
355 cycle is also a variation of the TCA cycle, in which the steps that produce CO<sub>2</sub> are bypassed. Instead, the  
356 carbon atoms are shunted into gluconeogenesis, allowing a cell to build sugars from acetyl groups.  
357 Doing so is necessary for synthesizing nucleotides and cell wall carbohydrates when sugars are not  
358 available in the environment.

359 To assess the extent to which metabolic pathways are regulated by ScHst1 and KISir2, we scored all  
360 the genes in each pathway of interest for the association of ScHst1 or KISir2 and for induction in the  
361 absence of the deacetylase (Figure 3, Table S9). We found some pathways are regulated by KISir2 but  
362 not ScHst1, including the methylcitrate, fatty acid  $\beta$ -oxidation, glycerol utilization, and ethanol/acetate  
363 utilization pathways. In contrast, both sirtuins have the potential to regulate the TCA and glyoxylate  
364 cycles. Thus, in *K. lactis* a drop in intracellular NAD<sup>+</sup> that compromises KISir2 activity would lead to the  
365 increased expression of genes required to utilize non-sugar carbon sources.

366 Given that metabolic flux in *K. lactis sir2Δ* cells might be shifted away from glucose consumption, we  
367 compared the growth of wild-type and *sir2Δ* strains in several carbon sources. In glucose, *K. lactis sir2Δ*  
368 cells grew more slowly than wild-type cells (Figure 4A). In contrast, in *S. cerevisiae*, loss of Sir2 and Hst1

369 did not affect growth in glucose (Figure 4C). Interestingly, the *K. lactis sir2Δ* cells actually grew faster  
370 than wild-type cells in glycerol (Figure 4B). For *S. cerevisiae*, growth did not occur in minimal medium  
371 with 3% glycerol. These results are consistent with the model that KISir2 promotes the ability of *K.*  
372 *lactis* cells to utilize glucose efficiently by damping down pathways that favor other carbon sources.  
373 Such repression is presumably relieved in low NAD<sup>+</sup>.

374

### 375 ***KISir2 impacts resistance to heavy metals***

376 Several genes regulated by KISir2 are involved in stress responses (Table S7), including three genes  
377 responsible for removing the heavy metal arsenic from cells. In contrast, ScHst1 and ScSir2 do not  
378 regulate these or similar genes. To test whether the presence of Sir2 or Hst1 affects resistance to  
379 arsenic, we grew wild-type and mutant cells on YPD supplemented with sodium arsenate. We found  
380 that growth of wild-type *K. lactis* cells was reduced in sodium arsenate, whereas *sir2Δ* cells grew  
381 similarly in the presence or absence of sodium arsenate (Figure 5A). Note that in this medium  
382 containing glucose, the *sir2Δ* cells grew more slowly than wildtype cells, consistent with our findings in  
383 Figure 4. *S. cerevisiae* cells were more resistant to arsenate than *K. lactis*, as a higher concentration  
384 was required to impact growth. In contrast to *K. lactis*, wildtype and *sir2Δ hst1Δ S. cerevisiae* cells grew  
385 similarly in sodium arsenate (Figure 5B). Thus, KISir2 impedes the ability of *K. lactis* cells to detoxify  
386 arsenic, but ScHst1 and ScSir2 do not act similarly in *S. cerevisiae*.

387

### 388 ***KISir2 impacts resistance to hydroxyurea, which depletes dNTPs***

389 Several genes regulated by KISir2 are involved in DNA synthesis (Table S7), including the gene  
390 encoding ribonucleotide reductase, the enzyme that reduces ribonucleotides (NTPs) to



391 deoxyribonucleotides (dNTPs). In contrast, ScHst1 and ScSir2 do not regulate these genes. We assessed  
392 whether Sir2 or Hst1 affects growth of cells in the presence of an inhibitor of ribonucleotide reductase,  
393 hydroxyurea (HU). We found that when *K. lactis* cells were grown in 20 mM HU, the growth was more  
394 severely impacted for wildtype cells than *sir2Δ* cells (Figure 5C). *S. cerevisiae* cells were more resistant  
395 to HU than *K. lactis*, as a higher concentration was required to impact growth. Nevertheless, wildtype  
396 and *sir2Δ hst1Δ S. cerevisiae* cells grew similarly in 400 mM HU (Figure 5D). Therefore, KISir2, but not  
397 ScHst1 or ScSir2, influenced the ability of cells to grow when ribonucleotide reductase is partially  
398 inhibited. These results are consistent with KISir2 reducing the production of dNTPs.

399

#### 400 **Genes regulated by ScHst1 and KISir2 are less likely than other genes to be evolutionarily conserved**

401 The results above reveal that *K. lactis* and *S. cerevisiae* have distinct growth phenotypes that can be  
402 attributed to genes that are repressed by KISir2 but not ScHst1. In addition to these conserved genes  
403 that are only regulated by the SUM1 complex in *K. lactis*, we found that a disproportionately high  
404 number of regulated genes only occur in one of the two species. To identify orthologs, we used a two-  
405 way BLASTP procedure described in the methods. This approach allowed us to assign *S. cerevisiae*  
406 orthologs for 103 of the 175 KISir2-regulated genes. Of the remaining genes, 56 had no significant  
407 BLASTP hit in *S. cerevisiae*. Another 16 had a hit but the two-way BLASTP search did not return to the  
408 starting *K. lactis* gene, indicating that the *S. cerevisiae* hit is actually the homolog of a different *K. lactis*  
409 gene. Thus, we identified *S. cerevisiae* orthologs for just 103 (59%) of the genes regulated by KISir2.  
410 (Manual refinement ultimately identified orthologs for 109 (62%) genes.) In contrast, for the genome  
411 as a whole, the same analysis identified *S. cerevisiae* orthologs for 90% of all *K. lactis* genes. To  
412 estimate the statistical probability that a random set of genes would deviate so much from the

413 genome-wide percentage, we generated 10,000 random sets of 175 *K. lactis* genes and recorded the  
414 percentage of genes in each set that had *S. cerevisiae* orthologs. As expected, the results are  
415 distributed around the genome-wide value of 90% (Figure 6A). Importantly, none of the 10,000 trials  
416 resulted in a percentage close to 59%, indicating that random chance does not explain the low  
417 percentage of KISir2-regulated genes with *S. cerevisiae* orthologs. We extended this analysis to other  
418 species and found that KISir2-regulated genes are also less likely to have orthologs in nine other fungal  
419 species (Figure 6B). Therefore the set of genes regulated by KISir2 is enriched for genes that are not  
420 widely conserved. We also found the same trend for SchSt1-regulated genes, with regulated genes  
421 having a lower percentage of orthologs in other species compared to total *S. cerevisiae* genes (Figure  
422 6C). Thus, genes regulated by Sir2 and Hst1 are more likely to be species-restricted than the average  
423 fungal gene. This observation is consistent with the model that sirtuins regulate genes that result in  
424 species-appropriate responses to low NAD<sup>+</sup>.

425

#### 426 ***KISir2 regulates synthesis of pulcherrimin, an iron-chelating compound not produced by most yeast***

427 Two KISir2-regulated genes that are not found in *S. cerevisiae* or many other yeasts are *PUL1* and  
428 *PUL2*. Together, Pul1 and Pul2 synthesize the secreted siderophore pulcherriminic acid, which chelates  
429 iron(III) to form a red-colored compound pulcherrimin (KRAUSE *et al.* 2018). *K. lactis* scavenges iron by  
430 importing pulcherrimin via a specific transporter, Pul3. It is speculated that microbes that use  
431 pulcherrimin to sequester iron gain an advantage over microbes that lack the transporter (SIPICZKI 2006;  
432 ORO *et al.* 2014; KRAUSE *et al.* 2018). To determine whether KISir2 influences the production of  
433 pulcherrimin, we spotted wild-type and *sir2Δ* cells on rich medium (YPD) supplemented with FeCl<sub>3</sub>  
434 (Figure 7). After two days, we observed a red halo surrounding the *K. lactis* cells. This halo was likely

435 due to pulcherrimin, as it did not form on plates lacking FeCl<sub>3</sub>. Moreover, it did not form around *S.*  
436 *cerevisiae* cells, which lack *PUL1* and *PUL2*. Importantly, in *sir2Δ K. lactis* cells, the red halo was more  
437 intense in color, consistent with KISir2 suppressing the production of pulcherrimin.

438

### 439 ***Loss of Hst1 and Sir2 reduced mating in both S. cerevisiae and K. lactis***

440 We did observe some functional categories of genes that are regulated by both ScHst1 and KISir2,  
441 including genes required for mating. In *S. cerevisiae*, these genes act relatively late in the mating  
442 pathway (Table S6). Specifically, four of the six mating genes encode proteins that are localized to the  
443 shmoo tip and are involved in cell fusion. Another gene is involved in nuclear fusion, and the last  
444 damps down pheromone signaling. Similarly, three KISir2-regulated genes also encode proteins  
445 associated with the shmoo tip and cell fusion. However, there are also four KISir2-regulated genes  
446 involved in the earliest steps of (Table S7). These include a pheromone (alpha factor) and two subunits  
447 of the G protein that signals pheromone binding. Given that *K. lactis* delays mating until it encounters  
448 nutrient deprivation, an appealing hypothesis is that nutrient deprivation is associated with a drop in  
449 intracellular NAD<sup>+</sup>, which in turn triggers a reduction of KISir2 activity and increased expression of  
450 mating genes. Thus, KISir2 could help restrict mating to nutrient poor conditions. In contrast, ScHst1  
451 may not play this role, as *S. cerevisiae* mates in rich nutrient conditions.

452 To test the hypothesis that KISir2 hinders mating by repressing mating genes, we developed a  
453 quantitative mating assay based on imaging cytometry. This approach was necessary because *K. lactis*  
454 mates at a low frequency. For both wild type and *sir2Δ* strains, we generated *MATα* cells that  
455 expressed GFP and *MATα* cells that expressed mCherry. In addition, the cryptic mating-type loci were  
456 deleted so *sir2Δ* cells would not be sterile pseudodiploids, and the strains were made prototrophic to

457 eliminate nutritional dependencies that might influence mating. *MAT $\alpha$*  and *MAT $\alpha$*  haploid cells were  
458 grown together on malt extract to induce mating and were then examined using an Image Stream  
459 cytometer. Mated zygotes were identified as those cells that were both red and green and had the  
460 classic hourglass shape. Consistent with previous studies (HERMAN AND ROMAN 1966), the efficiency of  
461 mating was very low. Nevertheless, zygote formation was significantly lower in the *sir2 $\Delta$*  strain,  
462 compared to the wild type (Figure 8A). This result indicated that although Sir2 does influence the  
463 efficiency of mating, the direction of change was opposite to our prediction that increased expression  
464 of mating genes in the *sir2 $\Delta$*  strain would enhance mating.

465 For comparison, we also examined whether the absence of ScHst1 and ScSir2 influenced the ability  
466 of *S. cerevisiae* cells to mate. In this case, it was not necessary to use imaging cytometry because the  
467 efficiency of mating in *S. cerevisiae* is much higher. Instead, a known number of haploid cells of one  
468 mating-type was spread on a lawn of the opposite mating type. Only diploids had the necessary  
469 markers to grow on the selective plate, allowing us to determine the fraction of cells that mated. As for  
470 *K. lactis*, the silent mating-type loci were deleted so the loss of Sir2-silencing would not lead to a sterile  
471 pseudodiploid state. The *sir2 $\Delta$  hst1 $\Delta$*  strains had slightly reduced mating when the *MAT $\alpha$*  stain was  
472 used as the lawn and a more pronounced decrease in mating when the *MAT $\alpha$*  stain was used as the  
473 lawn (Figure 8B). Thus, the loss of ScSir2 and ScHst1 reduced mating in *S. cerevisiae*, just as the loss of  
474 KISir2 did in *K. lactis*. Therefore, even though only KISir2 regulates early mating genes, ScHst1 and  
475 KISir2 both impact the mating process similarly. We speculate that the timing of mating events may be  
476 perturbed in the absence of ScHst1 or KISir2.

477

478 ***Loss of Hst1 and Sir2 shortened the time to sporulation in both S. cerevisiae and K. lactis***

479 When diploid yeast cells are starved for nitrogen, they initiate meiosis. The four resulting haploid  
480 nuclei are each encased in a special cell wall and become spores. Both ScHst1 and KISir2 repress  
481 sporulation genes (Figure 1E) (XIE *et al.* 1999; HICKMAN AND RUSCHE 2009). However, different classes of  
482 genes are regulated in the two species. In *S. cerevisiae*, 84% (36/43) of ScHst1-regulated sporulation  
483 genes are “mid-sporulation genes” involved in formation of the spore membrane and wall. In contrast,  
484 in *K. lactis* only 64% (23/36) of KISir2-regulated genes are involved in this phase of sporulation. Other  
485 genes are involved in earlier steps of meiosis, including four genes involved in chromosome pairing and  
486 segregation. It is particularly striking that KISir2 regulates three meiotic transcription factors, including  
487 *IME1*, the master inducer of meiosis (Table S7). Based on this observation, we hypothesized that loss of  
488 KISir2 would advance the timing of sporulation in *K. lactis* whereas loss of ScHst1 would not do so in *S.*  
489 *cerevisiae*. To test this hypothesis, diploid cells freshly grown from freezer stocks were placed on  
490 sporulation medium. These cells were examined microscopically every two hours, and the fraction of  
491 tetrads (products of sporulation) was scored. As predicted, we found that at each time point a greater  
492 percentage of *K. lactis sir2Δ* cells had sporulated compared to wild-type cells (Figure 8C). Surprisingly  
493 however, we found the same trend for *S. cerevisiae* cells (Figure 8D). Therefore, both KISir2 and ScHst1  
494 delay sporulation. Even though KISir2 regulates more early-sporulation genes than ScHst1 does, both  
495 deacetylases impact the sporulation process similarly.

496

## DISCUSSION

497 In this study, we examined the hypothesis that Sir2 functions as a transcriptional rewiring point,  
498 potentially leading to species-appropriate adaptive responses to conditions that decrease intracellular  
499 NAD<sup>+</sup> levels. We compared genes regulated by Sir2 and its paralog Hst1 in two yeast species that  
500 diverged over 100 million years ago (SHEN *et al.* 2018), and we found that some biological processes  
501 regulated by these deacetylases are common to both species. Nevertheless, the specific genes that are  
502 regulated are distinct, indicating significant plasticity in the targets of Sir2 and Hst1 over evolutionary  
503 time. In addition, KISir2 regulates genes in functional categories not regulated by ScHst1 or ScSir2, such  
504 as utilization of non-glucose carbon sources, DNA replication, resistance to heavy metals, and  
505 production of the siderophore pulcherrimin. These findings indicate the Sir2 can serve as a  
506 transcriptional rewiring point.

507 It is striking that even though *S. cerevisiae* and *K. lactis* have evolved separately for over 100 million  
508 years, many of the same biological processes are regulated by Sir2 and Hst1 in the two species. These  
509 processes include NAD<sup>+</sup> homeostasis, mating, and sporulation. This finding suggests that the last  
510 common ancestor of *S. cerevisiae* and *K. lactis* also employed Sir2 to regulate these processes and that  
511 connecting these processes to NAD<sup>+</sup> levels has remained evolutionarily advantageous. Indeed, there is  
512 a clear benefit to regulating NAD<sup>+</sup> homeostasis genes through a feedback loop in which a drop in NAD<sup>+</sup>  
513 levels relieves repression of these genes. It may also be advantageous for mating and sporulation to be  
514 regulated by an NAD<sup>+</sup>-dependent repressor, as these events often occur under low nutrient conditions  
515 that could coincide with decreased availability of NAD<sup>+</sup>.

516 It is also striking that different genes involved in the same biological processes are regulated by  
517 ScHst1 and KISir2. For example, only 17 out of 43 ScHst1-regulated sporulation genes (40%) are also

518 regulated in *K. lactis*. This finding could indicate that it is not critical which specific genes within a  
519 functional category are regulated. Alternatively, it could indicate nuanced differences in how the two  
520 species mount developmental programs such as mating or sporulation. For example, it might be more  
521 advantageous for *K. lactis* than *S. cerevisiae* to employ Sir2 to integrate information about NAD<sup>+</sup> levels  
522 into the expression of early sporulation genes, including the master regulator *IME1*. If so, there might  
523 be particular situations in which fluctuations in NAD<sup>+</sup> levels would impact mating or sporulation in one  
524 species but not the other. Nevertheless, under the conditions we examined, the loss of the Sir2 and  
525 Hst1 impacted mating and sporulation similarly in both species.

526 An important finding is that KISir2 regulates additional genes not associated with the functional  
527 categories regulated by ScHst1. Induction of these genes in low NAD<sup>+</sup> conditions might be adaptive for  
528 *K. lactis* but not for *S. cerevisiae*. For example, KISir2 regulates genes that metabolize non-glucose  
529 carbon sources. The regulation of these genes in *K. lactis* might relate to its use of respiration rather  
530 than fermentation in the presence of oxygen. We also observed that KISir2 regulates genes involved in  
531 heavy metal efflux, dNTP production, and siderophore synthesis, whereas these genes were not  
532 regulated in *S. cerevisiae*. Similarly, others have found that in the pathogenic yeast *Candida glabrata*,  
533 Sir2 and Hst1 regulate genes that favor growth in a mammalian host (DE LAS PENAS *et al.* 2003; ORTA-  
534 ZAVALZA *et al.* 2013). These observations suggest that Sir2 does serve as a rewiring point, such that  
535 some processes are linked to NAD<sup>+</sup> availability only in certain species.

536 It is notable that a higher than expected number of Sir2- and Hst1-regulated genes lack orthologs in  
537 other fungal species. This observation is consistent with sirtuin deacetylases contributing to the  
538 acquisition of distinct responses to low NAD<sup>+</sup>. Only 59% of KISir2-regulated genes have *S. cerevisiae*  
539 orthologs, whereas 90% of all *K. lactis* genes do. Similarly, 62% of ScHst1-regulated genes compared to  
540 86% of all *S. cerevisiae* genes have *K. lactis* orthologs. Thus, Sir2- and Hst1-repressed genes are more

541 likely than the average gene to be restricted to a few species. Such genes are likely to provide unique  
542 functions, such as siderophore production, to the species in which they reside, and hence their being  
543 regulated by Sir2 or Hst1 is consistent with the hypothesis that bringing new processes under the  
544 control of sirtuins is associated with organism-specific responses to low NAD<sup>+</sup> stress. In the future, it  
545 will be interesting to determine the functions of these species-restricted genes.

546 An important technical consideration that emerged during this study is that some regulated genes  
547 were likely missed by the approach of combining ChIP and gene expression data. In particular, some  
548 Sir2- and Hst1-repressed genes might require a transcriptional activator for expression but that  
549 activator might not have been available under the standard growth conditions we used. Consequently,  
550 such a gene would not be induced in the absence of the sirtuin repressor. This scenario could account  
551 for the larger number of genes that were associated with Sir2 or Hst1 than were induced in the  
552 absence of these sirtuins. It is therefore probable that under other growth conditions, additional Sir2-  
553 and Hst1-regulated genes could be identified.

554 In summary, our results are consistent with the hypothesis that sirtuins are rewiring points that  
555 allow species to evolve distinct responses to low NAD<sup>+</sup> stress. Because sirtuins require NAD<sup>+</sup> for  
556 enzymatic activity, they are hard-wired to respond to fluctuations in intracellular NAD<sup>+</sup> and can be  
557 thought of as dedicated rewiring points for making a cellular process sensitive to NAD<sup>+</sup> levels. Bringing  
558 new genes under the control of Sir2 or Hst1 enables yeast species to develop patterns of gene  
559 expression that evoke an appropriate response to low NAD<sup>+</sup>, potentially increasing fitness.



560

## ACKNOWLEDGEMENTS

561 We thank David MacAlpine for assistance designing the *K. lactis* microarrays. We thank Stefan Astrom,  
562 Juergen Heinisch, Peter Philippsen, Lorraine Pillus, Jasper Rine, Hana Sychrova, and Christopher Taron  
563 (New England Biolabs) for strains and plasmids. We thank the members of the Rusche lab for  
564 suggestions and support.

565

### 566 **Competing interests**

567 The authors declare that they have no competing interests.

568

### 569 **Author Contributions**

570 The *K. lactis* ChIP-chip dataset was generated by MH. The *K. lactis* 2012 RNA-seq dataset was  
571 generated by SH. The experiments shown in Figures 4, 5, and 7 were conducted by HM. All other  
572 experiments were conducted by KH. The bioinformatics analysis was performed by LZ and TL. The  
573 manuscript and figures were prepared by KH and LR.

## LITERATURE CITED

- 574 Anders, S., P. T. Pyl and W. Huber, 2015 HTSeq--a Python framework to work with high-throughput sequencing  
575 data. *Bioinformatics* 31: 166-169.
- 576 Anderson, R. M., K. J. Bitterman, J. G. Wood, O. Medvedik, H. Cohen *et al.*, 2002 Manipulation of a nuclear NAD<sup>+</sup>  
577 salvage pathway delays aging without altering steady-state NAD<sup>+</sup> levels. *J. Biol. Chem.* 277: 18881-  
578 18890.
- 579 Ashrafi, K., S. S. Lin, J. K. Manchester and J. I. Gordon, 2000 Sip2p and its partner snf1p kinase affect aging in *S.*  
580 *cerevisiae*. *Genes Dev.* 14: 1872-1885.
- 581 Astrom, S. U., A. Kegel, J. O. Sjostrand and J. Rine, 2000 *Kluyveromyces lactis* Sir2p regulates cation sensitivity  
582 and maintains a specialized chromatin structure at the cryptic alpha-locus. *Genetics* 156: 81-91.
- 583 Bedalov, A., M. Hirao, J. Posakony, M. Nelson and J. A. Simon, 2003 NAD<sup>+</sup>-dependent deacetylase Hst1p controls  
584 biosynthesis and cellular NAD<sup>+</sup> levels in *Saccharomyces cerevisiae*. *Mol. Cell. Biol.* 23: 7044-7054.
- 585 Belenky, P., F. G. Racette, K. L. Bogan, J. M. McClure, J. S. Smith *et al.*, 2007 Nicotinamide riboside promotes Sir2  
586 silencing and extends lifespan via Nrk and Urh1/Pnp1/Meu1 pathways to NAD<sup>+</sup>. *Cell* 129: 473-484.
- 587 Booth, L. N., B. B. Tuch and A. D. Johnson, 2010 Intercalation of a new tier of transcription regulation into an  
588 ancient circuit. *Nature* 468: 959-963.
- 589 Borde, V., N. Robine, W. Lin, S. Bonfils, V. Geli *et al.*, 2009 Histone H3 lysine 4 trimethylation marks meiotic  
590 recombination initiation sites. *EMBO J* 28: 99-111.
- 591 Braunstein, M., A. B. Rose, S. G. Holmes, C. D. Allis and J. R. Broach, 1993 Transcriptional silencing in yeast is  
592 associated with reduced nucleosome acetylation. *Genes Dev.* 7: 592-604.
- 593 Byrne, K. P., and K. H. Wolfe, 2005 The Yeast Gene Order Browser: combining curated homology and syntenic  
594 context reveals gene fate in polyploid species. *Genome Res* 15: 1456-1461.
- 595 De Las Penas, A., S. J. Pan, I. Castano, J. Alder, R. Cregg *et al.*, 2003 Virulence-related surface glycoproteins in the  
596 yeast pathogen *Candida glabrata* are encoded in subtelomeric clusters and subject to RAP1- and SIR-  
597 dependent transcriptional silencing. *Genes Dev.* 17: 2245-2258.
- 598 Ellahi, A., D. M. Thurtle and J. Rine, 2015 The Chromatin and Transcriptional Landscape of Native *Saccharomyces*  
599 *cerevisiae* Telomeres and Subtelomeric Domains. *Genetics* 200: 505-521.
- 600 Friedlander, G., D. Joseph-Strauss, M. Carmi, D. Zenvirth, G. Simchen *et al.*, 2006 Modulation of the transcription  
601 regulatory program in yeast cells committed to sporulation. *Genome Biol* 7: R20.
- 602 Froyd, C. A., S. Kapoor, F. Dietrich and L. N. Rusche, 2013 The deacetylase Sir2 from the yeast *Clavispora*  
603 *lusitaniae* lacks the evolutionarily conserved capacity to generate subtelomeric heterochromatin. *PLoS*  
604 *Genet* 9: e1003935.
- 605 Gottlieb, S., and R. E. Esposito, 1989 A new role for a yeast transcriptional silencer gene, *SIR2*, in regulation of  
606 recombination in ribosomal DNA. *Cell* 56: 771-776.
- 607 Gottschling, D. E., O. M. Aparicio, B. L. Billington and V. A. Zakian, 1990 Position effect at *S. cerevisiae* telomeres:  
608 reversible repression of Pol II transcription. *Cell* 63: 751-762.
- 609 Greiss, S., and A. Gartner, 2009 Sirtuin/Sir2 phylogeny, evolutionary considerations and structural conservation.  
610 *Mol Cells* 28: 407-415.
- 611 Heinisch, J. J., U. Buchwald, A. Gottschlich, N. Heppeler and R. Rodicio, 2010 A tool kit for molecular genetics of  
612 *Kluyveromyces lactis* comprising a congeneric strain series and a set of versatile vectors. *FEMS Yeast Res*  
613 10: 333-342.
- 614 Herman, A., and H. Roman, 1966 Allele specific determinants of homothallism in *Saccharomyces lactis*. *Genetics*  
615 53: 727-740.
- 616 Hickman, M. A., and L. N. Rusche, 2007 Substitution as a mechanism for genetic robustness: the duplicated  
617 deacetylases Hst1p and Sir2p in *Saccharomyces cerevisiae*. *PLoS Genetics* 3: e126.
- 618 Hickman, M. A., and L. N. Rusche, 2009 The Sir2-Sum1 complex represses transcription using both promoter-  
619 specific and long-range mechanisms to regulate cell identity and sexual cycle in the yeast *Kluyveromyces*  
620 *lactis*. *PLoS Genet* 5: e1000710.

- 621 Imai, S., C. M. Armstrong, M. Kaerberlein and L. Guarente, 2000 Transcriptional silencing and longevity protein  
622 Sir2 is an NAD-dependent histone deacetylase. *Nature* 403: 795-800.
- 623 Kapoor, S., L. Zhu, C. Froyd, T. Liu and L. N. Rusche, 2015 Regional centromeres in the yeast *Candida lusitanae*  
624 lack pericentromeric heterochromatin. *Proc Natl Acad Sci U S A*.
- 625 Kiers, J., A. M. Zeeman, M. Luttik, C. Thiele, J. I. Castrillo *et al.*, 1998 Regulation of alcoholic fermentation in  
626 batch and chemostat cultures of *Kluyveromyces lactis* CBS 2359. *Yeast* 14: 459-469.
- 627 Kim, D., G. Pertea, C. Trapnell, H. Pimentel, R. Kelley *et al.*, 2013 TopHat2: accurate alignment of transcriptomes  
628 in the presence of insertions, deletions and gene fusions. *Genome Biol* 14: R36.
- 629 King, M. C., and A. C. Wilson, 1975 Evolution at two levels in humans and chimpanzees. *Science* 188: 107-116.
- 630 Krause, D. J., J. Kominek, D. A. Ofulente, X. X. Shen, X. Zhou *et al.*, 2018 Functional and evolutionary  
631 characterization of a secondary metabolite gene cluster in budding yeasts. *Proc Natl Acad Sci U S A* 115:  
632 11030-11035.
- 633 Lee, S., M. L. Gaspar, M. A. Aregullin, S. A. Jesch and S. A. Henry, 2013 Activation of protein kinase C-mitogen-  
634 activated protein kinase signaling in response to inositol starvation triggers Sir2p-dependent telomeric  
635 silencing in yeast. *J Biol Chem* 288: 27861-27871.
- 636 Li, H., and R. Durbin, 2009 Fast and accurate short read alignment with Burrows-Wheeler transform.  
637 *Bioinformatics* 25: 1754-1760.
- 638 Li, M., B. J. Petteys, J. M. McClure, V. Valsakumar, S. Bekiranov *et al.*, 2010 Thiamine biosynthesis in  
639 *Saccharomyces cerevisiae* is regulated by the NAD<sup>+</sup>-dependent histone deacetylase Hst1. *Mol Cell Biol*  
640 30: 3329-3341.
- 641 Li, M., V. Valsakumar, K. Poorey, S. Bekiranov and J. S. Smith, 2013 Genome-wide analysis of functional sirtuin  
642 chromatin targets in yeast. *Genome Biol* 14: R48.
- 643 Marchfelder, U., K. Rateitschak and A. E. Ehrenhofer-Murray, 2003 SIR-dependent repression of non-telomeric  
644 genes in *Saccharomyces cerevisiae*? *Yeast* 20: 797-801.
- 645 McCord, R., M. Pierce, J. Xie, S. Wonkatal, C. Mickel *et al.*, 2003 Rfm1, a novel tethering factor required to recruit  
646 the Hst1 histone deacetylase for repression of middle sporulation genes. *Mol. Cell. Biol.* 23: 2009-2016.
- 647 Ohno, S., 1970 *Evolution by gene duplication*. Springer-Verlag, New York.
- 648 Oro, L., M. Ciani and F. Comitini, 2014 Antimicrobial activity of *Metschnikowia pulcherrima* on wine yeasts. *J*  
649 *Appl Microbiol* 116: 1209-1217.
- 650 Orta-Zavalza, E., G. Guerrero-Serrano, G. Gutierrez-Escobedo, I. Canas-Villamar, J. Juarez-Cepeda *et al.*, 2013  
651 Local silencing controls the oxidative stress response and the multidrug resistance in *Candida glabrata*.  
652 *Mol Microbiol* 88: 1135-1148.
- 653 Rine, J., and I. Herskowitz, 1987 Four genes responsible for a position effect on expression from HML and HMR  
654 in *Saccharomyces cerevisiae*. *Genetics* 116: 9-22.
- 655 Robinson, M. D., D. J. McCarthy and G. K. Smyth, 2010 edgeR: a Bioconductor package for differential expression  
656 analysis of digital gene expression data. *Bioinformatics* 26: 139-140.
- 657 Rupert, C. B., J. M. Heltzel, D. J. Taylor and L. N. Rusche, 2016 Sporadic Gene Loss After Duplication Is Associated  
658 with Functional Divergence of Sirtuin Deacetylases Among *Candida* Yeast Species. *G3 (Bethesda)* 6:  
659 3297-3305.
- 660 Schiestl, R. H., and R. D. Gietz, 1989 High efficiency transformation of intact yeast cells using single stranded  
661 nucleic acids as a carrier. *Curr Genet* 16: 339-346.
- 662 Schmitt, M. E., T. A. Brown and B. L. Trumpower, 1990 A rapid and simple method for preparation of RNA from  
663 *Saccharomyces cerevisiae*. *Nucleic Acids Res.* 18: 3091-3092.
- 664 Shen, X. X., D. A. Ofulente, J. Kominek, X. Zhou, J. L. Steenwyk *et al.*, 2018 Tempo and Mode of Genome  
665 Evolution in the Budding Yeast Subphylum. *Cell* 175: 1533-1545 e1520.
- 666 Sipiczki, M., 2006 *Metschnikowia* strains isolated from botrytized grapes antagonize fungal and bacterial growth  
667 by iron depletion. *Appl Environ Microbiol* 72: 6716-6724.
- 668 Smith, J. S., C. B. Brachmann, I. Celic, M. A. Kenna, S. Muhammad *et al.*, 2000 A phylogenetically conserved  
669 NAD<sup>+</sup>-dependent protein deacetylase activity in the Sir2 protein family. *Proc. Natl. Acad. Sci. USA* 97:  
670 6658-6663.

- 671 Song, J. S., W. E. Johnson, X. Zhu, X. Zhang, W. Li *et al.*, 2007 Model-based analysis of two-color arrays (MA2C).  
672 Genome Biol 8: R178.
- 673 Teytelman, L., D. M. Thurtle, J. Rine and A. van Oudenaarden, 2013 Highly expressed loci are vulnerable to  
674 misleading CHIP localization of multiple unrelated proteins. Proc Natl Acad Sci U S A 110: 18602-18607.
- 675 Thurtle, D. M., and J. Rine, 2014 The molecular topography of silenced chromatin in *Saccharomyces cerevisiae*.  
676 Genes Dev 28: 245-258.
- 677 Trapnell, C., D. G. Hendrickson, M. Sauvageau, L. Goff, J. L. Rinn *et al.*, 2013 Differential analysis of gene  
678 regulation at transcript resolution with RNA-seq. Nat Biotechnol 31: 46-53.
- 679 Xie, J., M. Pierce, V. Gailus-Durner, M. Wagner, E. Winter *et al.*, 1999 Sum1 and Hst1 repress middle sporulation-  
680 specific gene expression during mitosis in *Saccharomyces cerevisiae*. EMBO J 18: 6448-6454.
- 681 Zhang, Y., T. Liu, C. A. Meyer, J. Eeckhoute, D. S. Johnson *et al.*, 2008 Model-based analysis of CHIP-Seq (MACS).  
682 Genome Biol 9: R137.

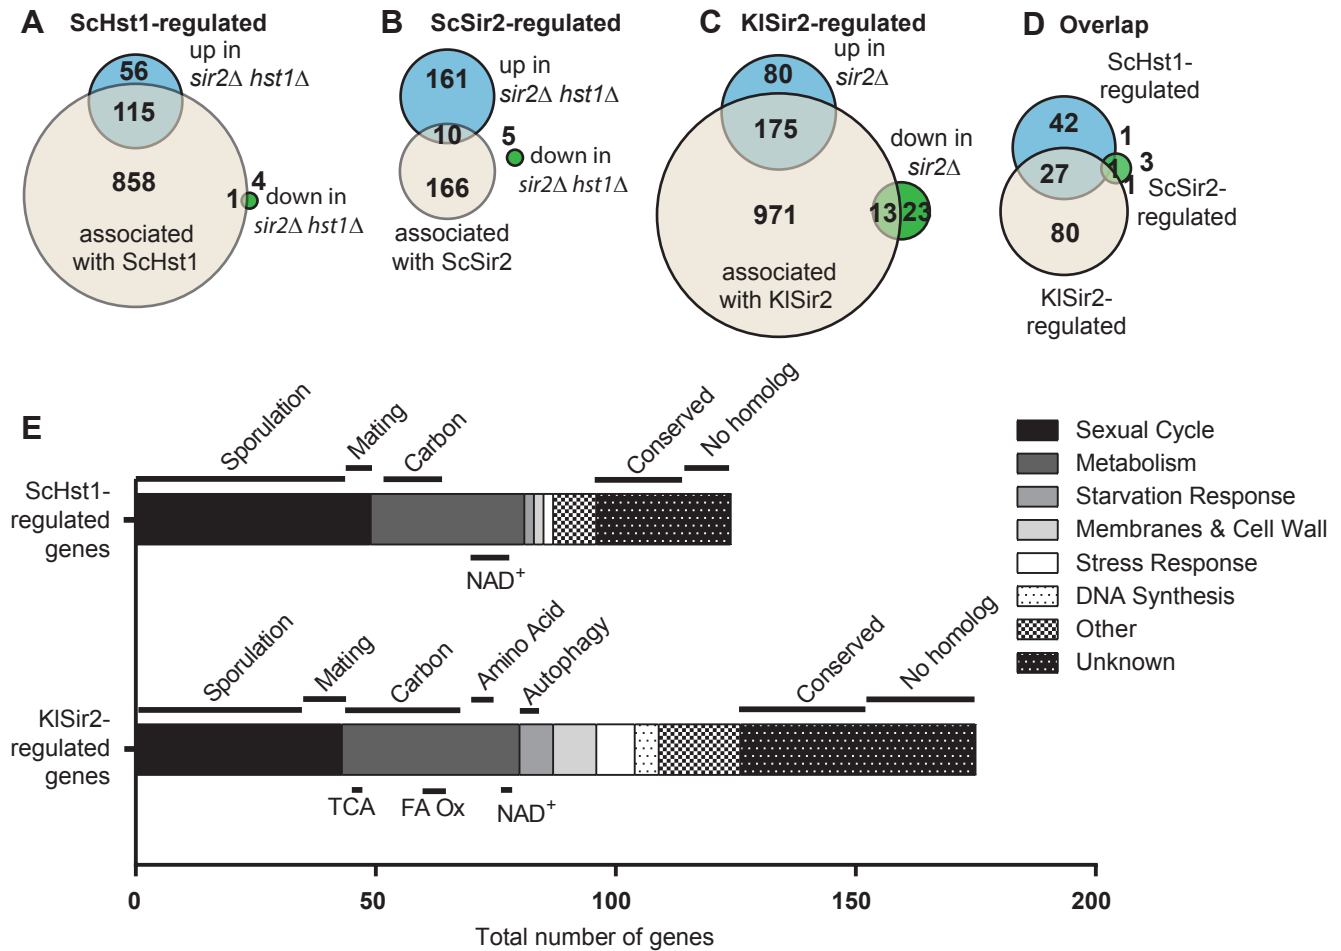

**Figure 1. Identification of genes regulated by ScSir2, ScHst1, and KISir2.**

(A) The overlap was determined for genes associated with ScHst1 (974), upregulated in *sir2Δ hst1Δ* cells (171), and downregulated in *sir2Δ hst1Δ* cells (5, including *SIR2* and *HST1*).

(B) The overlap was determined for genes associated with ScSir2 (176), upregulated in *sir2Δ hst1Δ* cells (171), and downregulated in *sir2Δ hst1Δ* cells (5).

(C) The overlap was determined for genes associated with KISir2 (1159), upregulated in *sir2Δ* cells (255), and downregulated in *sir2Δ* cells (36, including *SIR2*).

(D) The overlap was determined for genes regulated by ScSir2, ScHst1, and KISir2. Of the 71 ScHst1-regulated genes with orthologs in *K. lactis*, 28 were also regulated by KISir2. Of the six ScSir2-regulated genes with orthologs in *K. lactis*, two were also regulated by KISir2. Of the 109 KISir2-regulated genes with orthologs in *S. cerevisiae*, 28 were also regulated by ScHst1 and two were also regulated by ScSir2.

(E) Genes regulated by ScHst1 and KISir2 were manually grouped into functional categories based on GO terms and functional information (Tables S6 and S7). The bar graph represents the number of genes in each category.

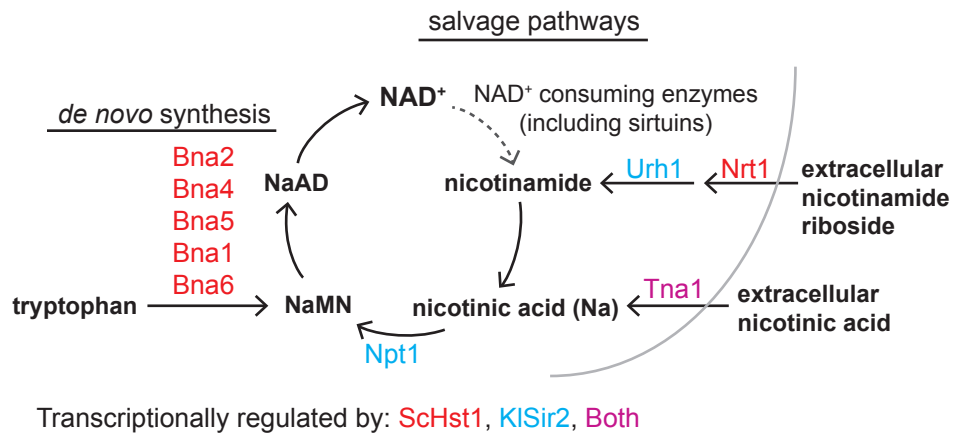

**Figure 2. ScHst1 and KISir2 regulate NAD<sup>+</sup> homeostasis through different genes.**

The NAD<sup>+</sup> *de novo* biosynthesis and salvage pathways are shown. Genes regulated by ScHst1 are colored red, by KISir2 are colored blue, and by both ScHst1 and KISir2 are purple. *URH1* was only upregulated in the older RNA-Seq dataset. NAD<sup>+</sup> is nicotinamide adenine dinucleotide, NaMN is nicotinic acid mononucleotide, NaAD is nicotinic acid adenine dinucleotide.

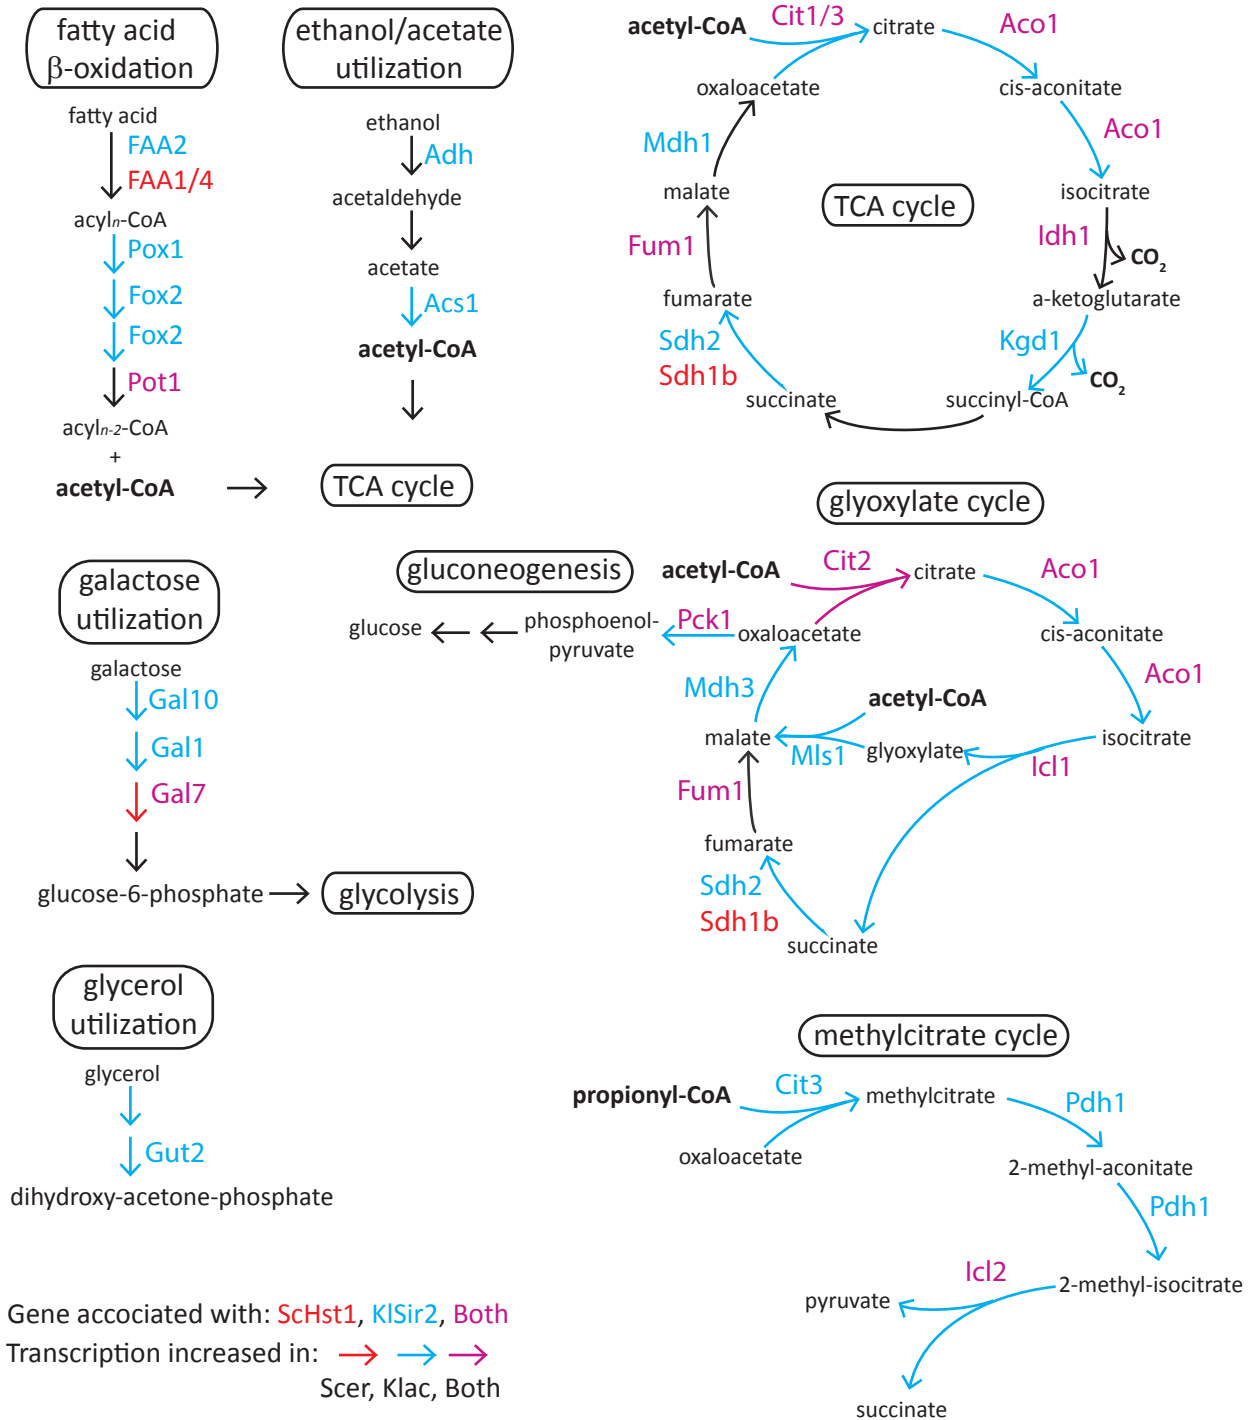

### Figure 3. Metabolic pathways regulated by ScHst1 and KISir2.

Regulation by ScHst1 and KISir2 was evaluated for each gene in metabolic pathways of interest. Gene names are colored red for association with ScHst1, blue for association with KISir2, and purple for association with both sirtuins. Arrows are colored red if the gene increased in *hst1 $\Delta$  sir2 $\Delta$*  compared to wild-type *S. cerevisiae*, blue if the gene increased in *sir2 $\Delta$*  compared to wild-type *K. lactis*, and purple if the gene increased in both species. For *K. lactis*, induction was evaluated using both RNA-Seq datasets. The genes evaluated are listed in Table S9. Galactose is converted to glucose-6-phosphate and then enters glycolysis. Glycerol is converted to dihydroxy-acetone-phosphate, an intermediate in glycolysis and gluconeogenesis. Non-fermentable carbon sources, including fatty acids, ethanol, and acetate, are metabolized to acetyl-CoA via the fatty acid  $\beta$ -oxidation and ethanol/acetate utilization pathways. The acetyl-CoA then feeds into the TCA cycle to produce energy or the glyoxylate cycle and gluconeogenesis to produce glucose. Fatty acids with odd numbers of carbons also generate propionyl-CoA, which is metabolized via the methylcitrate cycle.

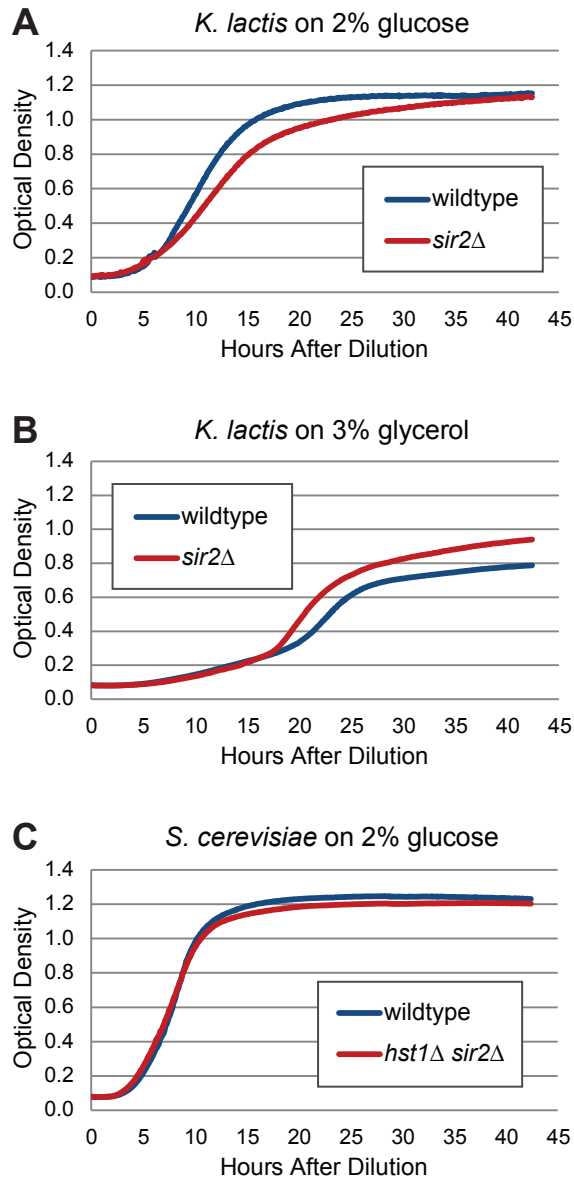

**Fig 4. KISir2 but not ScHst1 influenced growth rate in minimal medium.**

(A) *K. lactis* cells with or without SIR2 were grown in minimal medium (YM) with 2% glucose, and the density of the culture was recorded over time using a microplate reader. *K. lactis* strains were SIR2 (LRY2992) and *sir2Δ* (LRY2993).

(B) *K. lactis* cells were grown in minimal medium with 3% glycerol.

(C) *S. cerevisiae* cells with or without SIR2 and HST1 were grown in minimal medium with 2% glucose. The *S. cerevisiae* cells did not grow in minimal medium with 3% glycerol. *S. cerevisiae* strains were HST1 SIR2 (LRY3093) and *hst1Δ sir2Δ* (LRY3099).



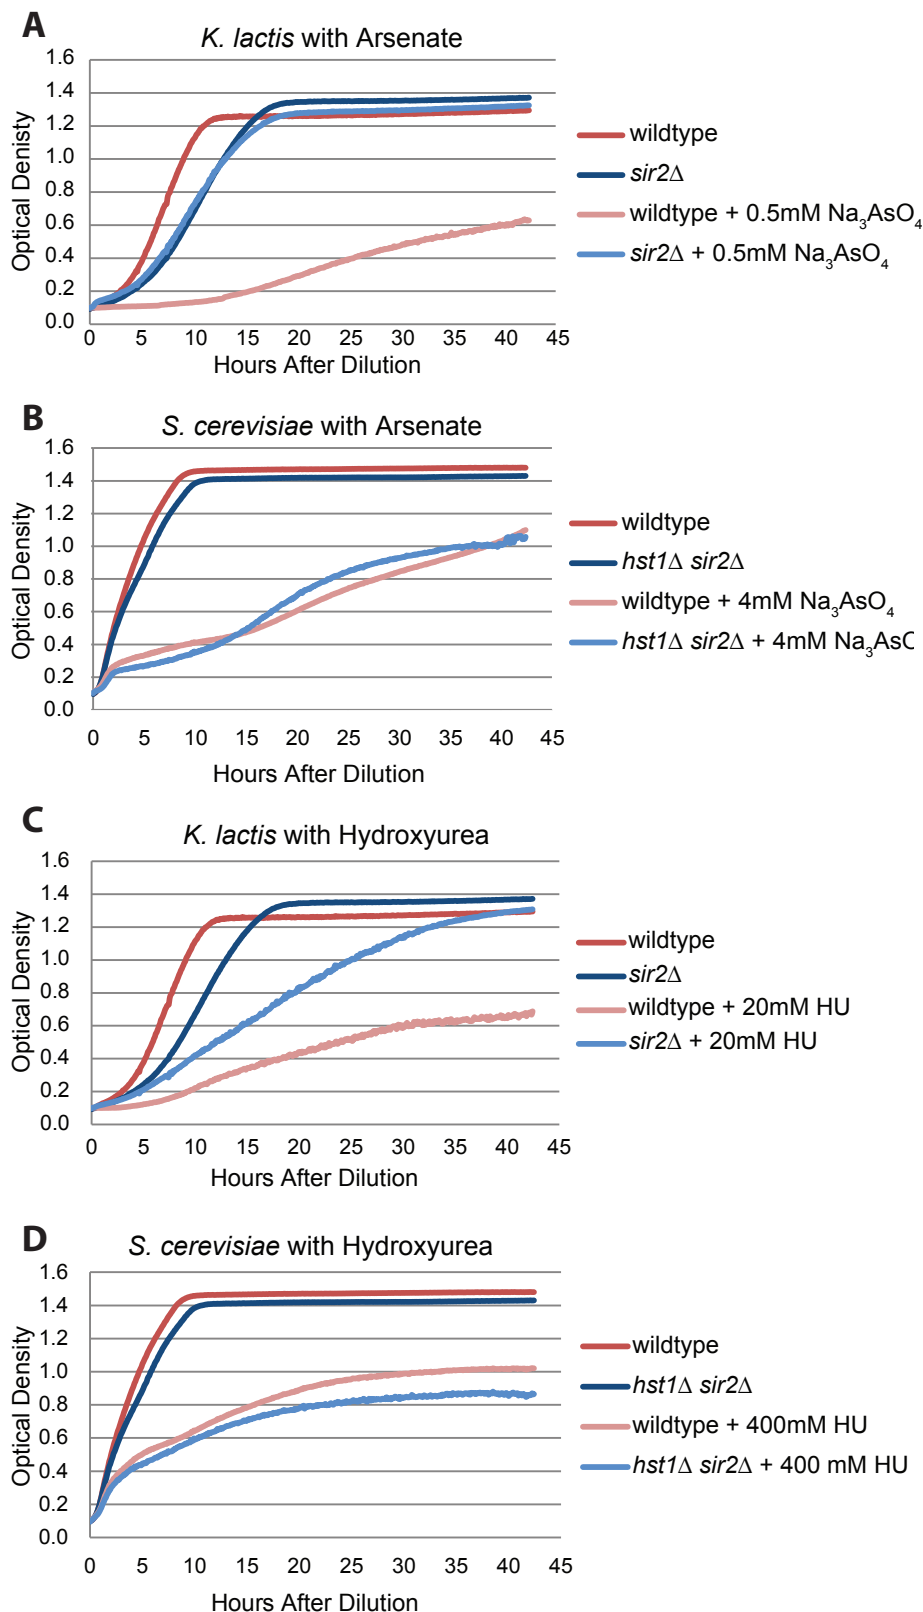

**Figure 5. KISir2 but not Schst1 influenced growth on arsenic and hydroxyurea.**

(A) *K. lactis* cells with and without *SIR2* were grown in rich medium (YPD) alone or with 0.5 mM sodium arsenate, and the density of the culture was recorded over time using a microplate reader. The same strains were used as for Figure 4.

(B) *S. cerevisiae* cells were grown in YPD alone or with 4 mM sodium arsenate, as described for panel A.

(C) *K. lactis* cells were grown in YPD alone or with 20 mM hydroxyurea.

(D) *S. cerevisiae* cells were grown in YPD alone or with 400 mM hydroxyurea.

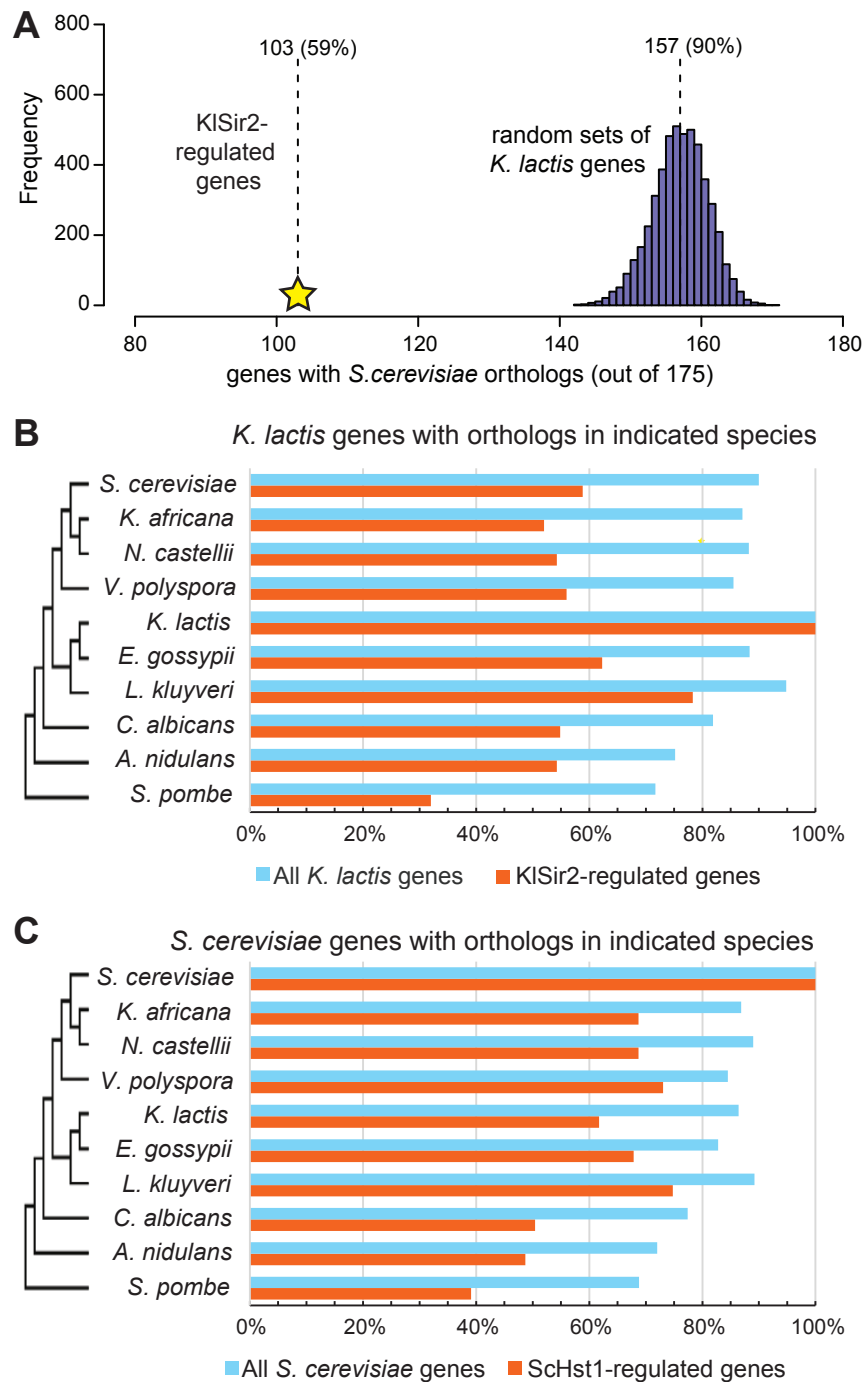

**Figure 6. Genes regulated by SchHst1 and KISir2 were less likely than other genes to be widely conserved.** (A) 10,000 sets of 175 randomly selected *K. lactis* genes were evaluated for the number of genes with *S. cerevisiae* orthologs. The results were distributed around 157 genes (90%). For the 175 KISir2-regulated genes, 103 (59%) had *S. cerevisiae* orthologs. This number is well outside the distribution for the randomly selected genes. (B) For *K. lactis*, the percentage of genes with orthologs in each of nine species is graphed for the 5076 total genes (blue) and the 175 KISir2-regulated genes (red). (C) For *S. cerevisiae*, the percentage of genes with orthologs in each of nine species is graphed for the 5906 total genes (blue) and the 115 SchHst1-regulated genes (red).

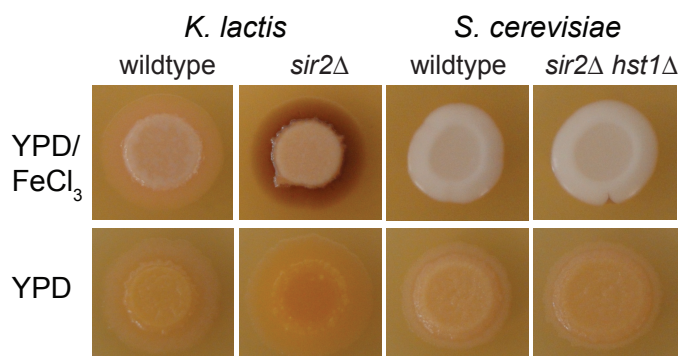

**Figure 7. KISir2 influenced production of the siderophore pulcherrimin.**

Exponentially growing cells were collected and spotted on rich medium (YPD) with or without 3.7 mM FeCl<sub>3</sub>. The plates were incubated two days and then imaged. The same strains were used as for Figure 4.

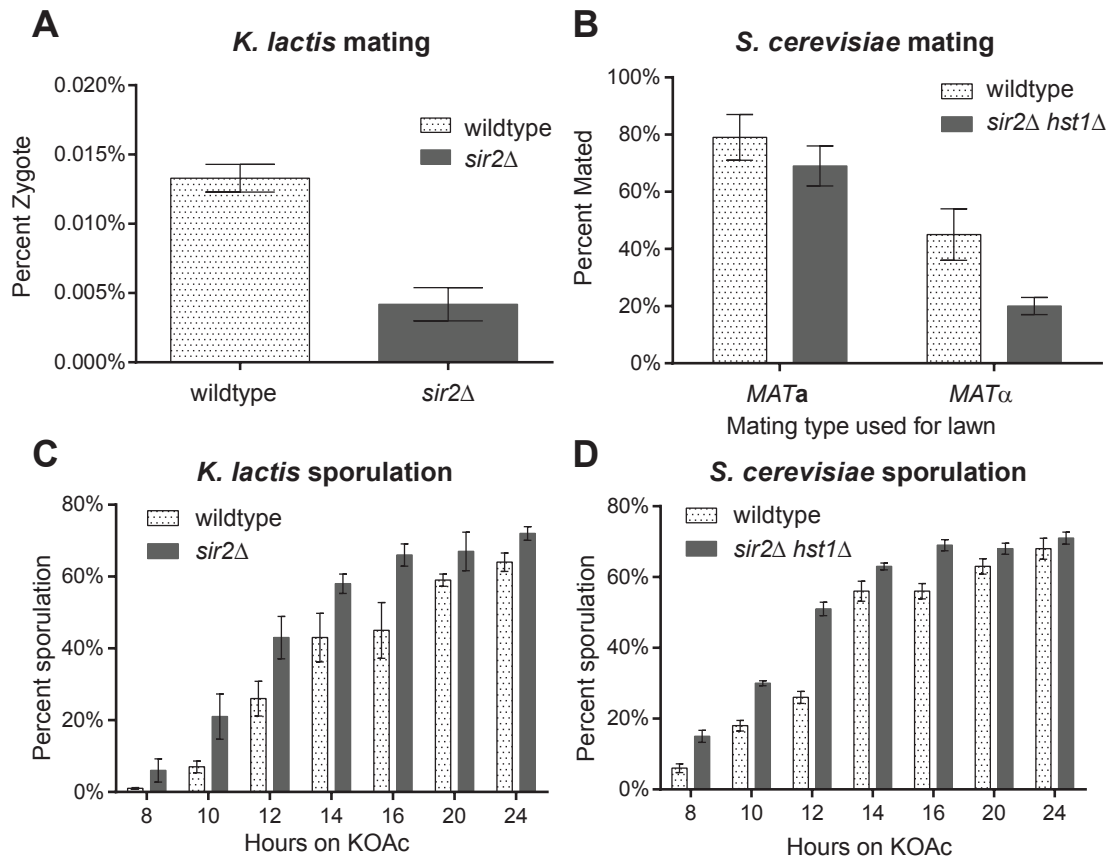

**Figure 8. Loss of SchHst1 and KISir2 decreased mating and increased sporulation.**

(A) Percentage of observed *K. lactis* cells that were zygotes. *MATa* and *MATα* cells were co-cultured on malt extract for three days, resuspended in water, sonicated, and then examined using ImageStream cytometry. For each sample, 100,000 events were collected. Cells that were in focus and showed both red and green fluorescence were identified using IDEAS software (EMD Millipore). These cells were then examined manually for an hourglass appearance typical of zygotes. Strains were *MATa SIR2 mCherry* (LRY3037 and 3038), *MATa sir2Δ mCherry* (LRY3039 and 3040), *MATα SIR2 GFP* (LRY3053 and 3054), and *MATα sir2Δ GFP* (LRY3055 and 3056). All strains lacked *HML* and *HMR*.

(B) Percentage of *S. cerevisiae* haploids that mated to produce diploids. A lawn of one mating-type was prepared using 2 OD of cells spread on minimal plates supplemented with histidine, tryptophan, and leucine. The other mating-type ( $2 \times 10^{-5}$  OD) was spread over the lawn to determine the number of cells that could mate. Only diploid cells could grow on these selective plates. The same volume of cells was also spread on rich (YPD) plates to determine the number of viable cells. Strains were *MATa HST1 SIR2 hmlaΔ* (LRY3104), *MATa hst1Δ sir2Δ hmlaΔ* (LRY3101), *MATα HST1 SIR2 hmraΔ* (LRY3093), and *MATα hst1Δ sir2Δ hmraΔ* (LRY3099).

(C) Percent sporulation over time for wild-type and *sir2Δ* *K. lactis* cells. Freshly grown diploid cells were patched onto KOAc sporulation plates and incubated at 30°C. At two hour intervals, cells were resuspended in water and examined microscopically. All cells in three fields of vision were scored as either having sporulated (tetrad morphology) or not. The experiment was conducted twice with four biological replicates (diploid strains) each time. Strains used were *SIR2* (LRY3019, 3029-31) and *sir2Δ* (LRY3020, 3032-34).

(D) Percent sporulation for wild-type and *hst1Δ sir2Δ* *S. cerevisiae* cells. The assay was conducted as described for panel B. Strains used were *HST1 SIR2* (LRY3108-3111) and *hst1Δ sir2Δ* (LRY3112-3115).

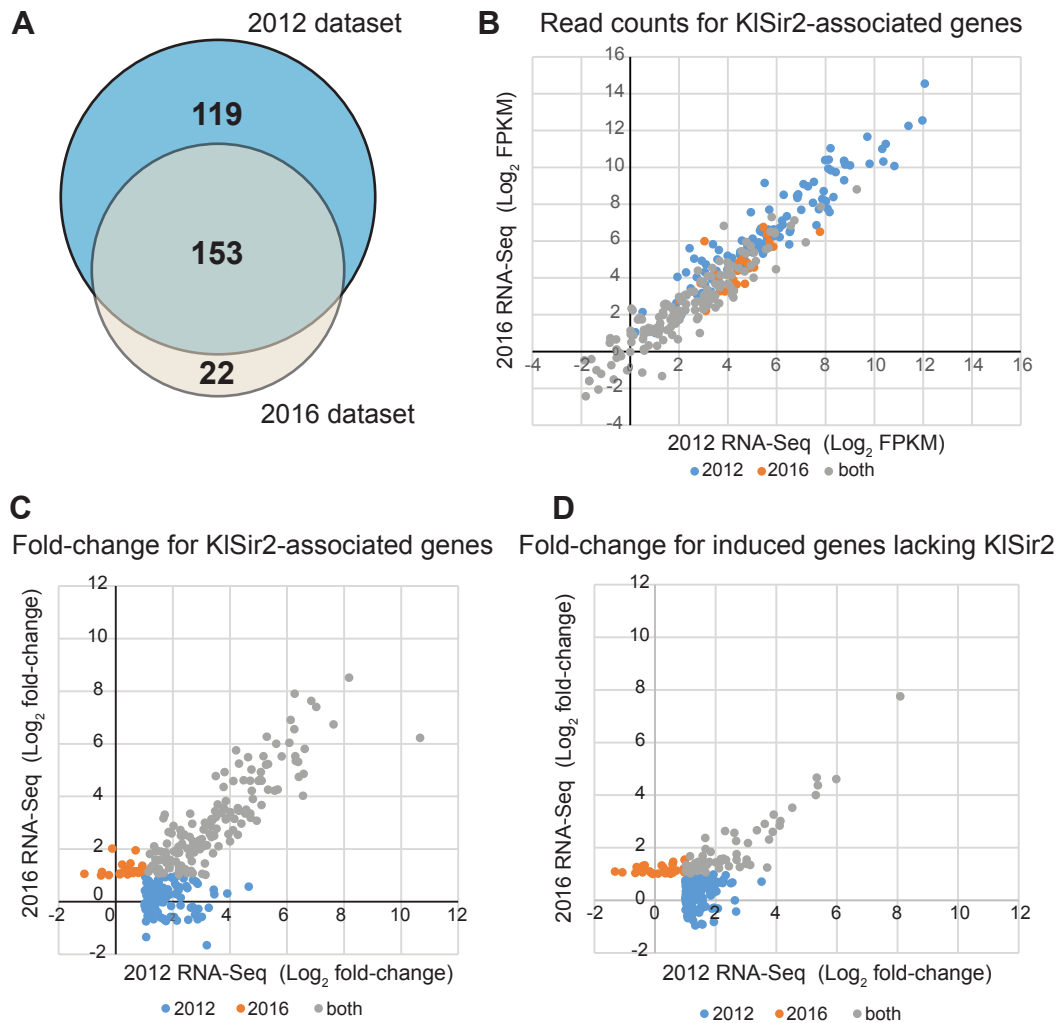

**Figure S1. Comparison of two *K. lactis* RNA-Seq datasets.**

(A) The overlap was determined for KISir2-associated genes induced in *sir2* $\Delta$  compared to wild-type cells in the 2012 RNA-Seq dataset (272) and the 2016 dataset (175).

(B) For each KISir2-associated gene induced in at least one dataset, the  $\text{log}_2$  FPKM (Fragments Per Kilobase of transcript per Million mapped reads) from wild-type cells from each dataset was plotted. Genes that were induced in both datasets (gray) tended to have lower expression (FPKM) than genes induced in only one of the two datasets (2012, blue or 2016, red).

(C) For each KISir2-associated gene induced in at least one dataset, the  $\text{log}_2$  fold-change (*sir2* $\Delta$ /wild-type) from each dataset was plotted. Genes that were induced in both datasets (gray) tended to have higher fold-change than genes induced in only one of the two datasets.

(D) For induced genes that were not associated with KISir2, the  $\text{log}_2$  fold-change (*sir2* $\Delta$ /wild-type) from each dataset was plotted. Fewer of these genes were induced in both datasets.

These data strengthen the conclusion that the 153 KISir2-associated genes induced in both datasets are repressed by KISir2.

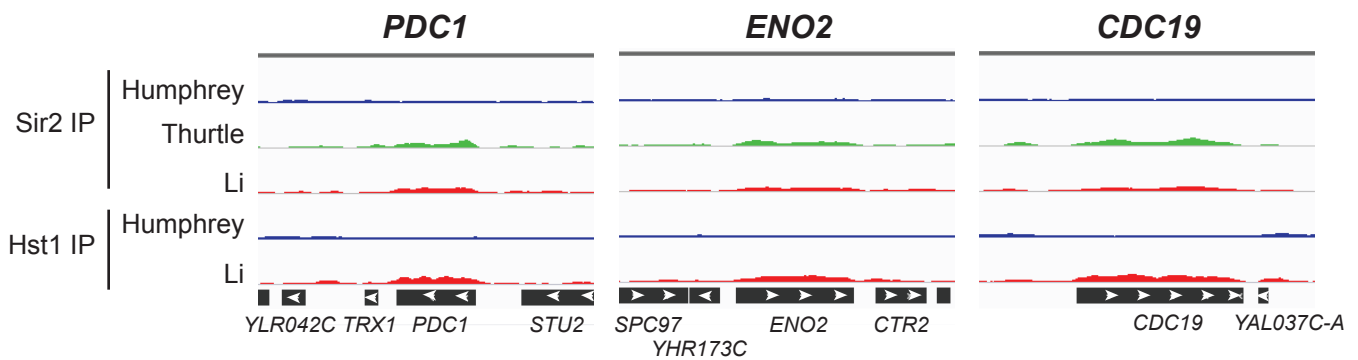

**Figure S2. ScSir2 and ScHst1 were not enriched at highly expressed genes.**

ScSir2 and ScHst1 ChIP-Seq reads from this study (Humphrey) and two others (Thurtle and Rine, 2014; Li et al., 2013) were piled up at three genomic loci reported to be associated with these deacetylases (Li et al., 2013). Our data revealed little enrichment of ScSir2 or ScHst1. In the other studies, slight enrichment was observed, but could result from a known “hyper-ChIP” artifact (Teytelman et al., 2013).

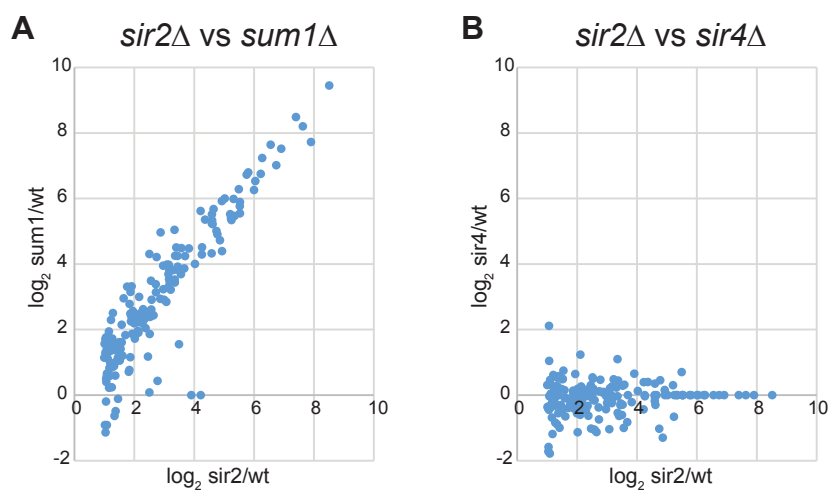

**Figure S3. Most KISir2-regulated genes were also regulated by KISum1.**

(A) For each KISir2-regulated gene, the log<sub>2</sub> fold-change was plotted for *sir2*Δ compared to wildtype cells and *sum1*Δ compared to wildtype cells.

(B) For the same genes, the log<sub>2</sub> fold-change was plotted for *sir2*Δ compared to wildtype cells and *sir4*Δ compared to wildtype cells.

## SUPPLEMENTAL MATERIALS AND METHODS

### ***Plasmid construction***

Plasmids used in this study are listed in Table S1. The *sir2Δ::NatMX* deletion cassette in pLR809 was generated by homologous recombination in yeast. Specifically, the reading frame of *KISIR2* in pLR730 (FROYD AND RUSCHE 2011) was replaced with NatMX amplified from pAGT100 (KAUFMANN AND PHILIPSEN 2009) using primers 5'-tagctggaactggagcgcggaatattcattatctggagttcCCAGTGAATTCGAGCTCGG and 5'-atcagatcataagtgattcaaagcaacaagatttattcaaCATGATTACGCCAAGCTTGC. For the *K. lactis* mating assay, fluorescent proteins were cloned into integrating vector pGBN19 (READ *et al.* 2007), which drives expression from the *LAC4* promoter. First, the MF $\alpha$ 1 leader sequence was removed from pGBN19 by digesting with *HinDIII* and *XhoI*, blunting the ends, and religating the plasmid to generate pLR1076. Next, yeast enhanced GFP (yEGFP) was excised from pKT128 (SHEFF AND THORN 2004) using *KpnI* and *BamHI* and ligated into the *KpnI* and *BglII* sites of pLR1076 to generate pLR1087. Separately, mCherry was excised from plasmid yEpGAP-cherry-MCS (KEPPLER-ROSS *et al.* 2008) using *HinDIII* and *BglII* and ligated into the *HinDIII* and *BglII* sites of pLR1076 to generate pLR1085.

### ***Yeast strain construction***

Yeast used in this study are listed in Table S2. Most *K. lactis* strains were derived from Os334 and Os335 (HEINISCH *et al.* 2010), which are congenic with the type strain CBS2359. To generate strains for RNA-Seq, we first deleted the *HM* loci. In strain Os334, *HML $\alpha$*  was replaced with loxP-flanked KanMX from pCUG6 (PRIBYLOVA *et al.* 2007), and in strain Os335, *HMR $\alpha$*  was replaced with loxP-flanked *LEU2* from pJJ955L (HEINISCH *et al.* 2010). The markers were then removed by transiently transforming the yeast with pJJ958 (HEINISCH *et al.* 2010) expressing Cre recombinase and *URA3*. Next, these two strains



were crossed to generate LRY2835 with both *HM* loci deleted. Finally, repressor proteins were deleted using the *sir2Δ::NatMX* deletion cassette from pLR809 to generate LRY2849 and 2850, the *sir4Δ::URA3* cassette from LRY1946 (HICKMAN AND RUSCHE 2009) to generate LRY3096, or a *sum1Δ::KanMX* cassette generated *in vitro* using the NEBuilder kit (New England Biolabs) and a KanMX cassette amplified from pFA6a-KanMX (BAHLER *et al.* 1998) to generate LRY3098. To generate prototrophic strains (LRY2992, LRY2993, LRY3027, and LRY3028), *ADE2*, *HIS3*, and *LEU2* were amplified from CK57-7A (CHEN AND CLARK-WALKER 1994) and used to transform the RNA-Seq strains as well as an isogenic *MATα* strain derived from the same cross that produced LRY2835. For the sporulation assay, diploid cells were generated by mating haploid strains that were intermediates in the construction of prototrophic strains. *MATα ura3* and *MATα leu2* haploids were mated to generate diploids homozygous for the deletions of the *HM* loci. For the mating assay, the prototrophic strains were transformed with constructs to integrate fluorescent proteins under the control of the *LAC4* promoter. *LAC4::mCherry* was derived from pLR1085 cut with HpaI and XmaI, and *LAC4::yEGFP* was derived from pLR1087 cut with SacII. For the ChIP-on-chip experiment, Sir2 was tagged as previously described (HICKMAN AND RUSCHE 2009) in strain SAY538 (BARSOUIM *et al.* 2010). The resulting strain was crossed to CK213-4c (KEGEL *et al.* 2006), and two of the progeny, LRY2021 and 2022, were used for chromatin IP. Ambiguities were later noted in the mating-type of LRY2022.

*S. cerevisiae* strains were derived from the standard laboratory strain W303-1b. Most were generated through transformations and crosses to recombine previously constructed alleles, including *hst1Δ::KanMX* and *sir2Δ::TRP1* (RUSCHE AND RINE 2001), *HST1::5HA-URA3* (RUSCHE AND RINE 2001; HICKMAN AND RUSCHE 2007), and *hmlαΔ::TRP1* (STONE *et al.* 2000). The *hmraΔ::URA3* allele was generated by one-step gene replacement using *URA3* amplified from pRS406 with oligos 5'-GAAATGCAAGGATTGGTGATGAGATAAGATAATGAAACATagattgtactgagagtgcac and 5'-

CCTCGAGGTGTAATCTAAATAATAACTTTATCGCAGTAGActgtgcggtatttcacaccg. The *SIR2::3HA-URA3* allele was generated by one-step gene insertion at the end of the *SIR2* reading frame using a 3xHA tag amplified from pLR522 (HANNER AND RUSCHE 2017) with primers 5'-ATGGAAAAAGATTTTCAAGTGAATAAGGAGATAAAACCGTAT ggcggccgcatcttttac and 5'-CAGGGTACACTTCGTTACTGGTCTTTTGTAGAATGATAAAgctcgaattcctgcagcccg.

### ***Yeast transformation***

*S. cerevisiae* cells were transformed using the PEG-LiOAc method (SCHIELTL AND GIETZ 1989). Cells were harvested at OD<sub>600</sub> around 1 and washed twice with 0.1 volumes of TEL (10 mM tris, pH 7.5, 1 mM EDTA, 100 mM LiOAc). Cells were resuspended in TEL at 10 µl/OD cells, and 100 µl of cells were added to 0.1 µg of linear DNA plus 30 µg sheared salmon sperm DNA. Cells were incubated at 30° for 30 minutes, combined with 750 µl 40% PEG-TEL, and incubated at 30° for 30 minutes. Finally, cells were heat shocked at 42° for 10 minutes and plated on selective medium. *K. lactis* cells were transformed using electroporation (HICKMAN AND RUSCHE 2009). Briefly, cells were harvested at an optical density around 1 and resuspended at 15 OD/ml in YPD containing 25 mM DTT and 20mM HEPES, pH 8. Cells were shaken for 30 minutes at 30°, collected, and washed in electroporation buffer (10mM tris pH7.5, 270mM sucrose, 1mM LiOAc). Cells were then resuspended at 100 OD/ml in electroporation buffer. Electroporation reactions were set up in 0.2 mm cuvettes using 50 µL cells, 1 µL 10 mg/mL salmon sperm DNA, and 0.5-1 µg DNA in a volume no more than 5 µL. Electroporation conditions were 1000 V, 300 Ω, and 25 µF. After electroporation, cells were incubated in YPD four hours at 30° and then spread on selective media.

### ***Chromatin IP and processing for microarray or sequencing***

For the ChIP on Chip experiment from *K. lactis*, chromatin IP was conducted as previously described (HICKMAN AND RUSCHE 2009), with some exceptions. Cells were crosslinked for one hour each in 10 mM DMA and then 1% formaldehyde. After cell lysis, chromatin was sonicated four times for 15 seconds. 160  $\mu$ l of lysate (derived from 10 OD equivalents of cells) was brought to a final volume of 400  $\mu$ l in lysis buffer and incubated overnight with 7  $\mu$ l anti-HA antibody (Upstate). The immunoprecipitated DNA was labeled with either Cy5- or Cy3-conjugated dUTP (Perkin Elmer NEL578001EA or NEL579001EA), using Klenow DNA polymerase (NEB M0212M) and random nonamer oligonucleotides (IDT). 500 ng of input DNA or an entire immuno-precipitated DNA sample was dried in a speed-vac and resuspended in 15  $\mu$ l of primer mix (1X NEB buffer 2, 5  $\mu$ g of random nonamer). Once the DNA was dissolved, 2 nmole of labeled dUTP was added in 2  $\mu$ l. The samples were placed in a thermocycler and denatured for 5 minutes at 95°, and then cooled to 4°. The samples were combined with 3  $\mu$ l of Klenow reaction mix, resulting in a final concentration of 1X NEB buffer 2, 0.25 mM dATP, 0.25 mM dCTP, 0.25 mM dGTP, 0.1 mM dTTP and 12.5 U of Klenow. The sample was ramped to 37° at 0.1°/sec and then incubated for 30 minutes. Following incubation, the sample was heat-denatured and cooled to 4°, and fresh Klenow (4 U) was added for a second round of labeling. Finally, unincorporated nucleotides, oligonucleotides, and dye were removed using Microcon YM-30 filters (Millipore). Labeled DNA was hybridized to the tiled Agilent array in hybridization buffer overnight at 65°. The microarray was washed and scanned according the manufacturer's instructions.

For the ChIP-Seq experiment from *S. cerevisiae*, chromatin IP was performed essentially as described (RUSCHE AND RINE 2001). Cells were harvested at OD<sub>600</sub> around 1. Cells were crosslinked for one hour each in 10 mM DMA and then 1% formaldehyde. The immunoprecipitation was conducted with 10 $\mu$ l of Protein A agarose beads in the absences of BSA and salmon sperm DNA. Library

preparation and sample barcoding was done at the Next-Generation Sequencing facility at University at Buffalo. The samples were then sequenced on an Illumina HiSeq2500 using 50 bp single-end sequencing.

## LITERATURE CITED

- Froyd, C. A., and L. N. Rusche, 2011 The duplicated deacetylases Sir2 and Hst1 subfunctionalized by acquiring complementary inactivating mutations. *Mol Cell Biol* 31: 3351-3365.
- Kaufmann, A., and P. Philippsen, 2009 Of bars and rings: Hof1-dependent cytokinesis in multiseptated hyphae of *Ashbya gossypii*. *Mol Cell Biol* 29: 771-783.
- Keppler-Ross, S., C. Noffz and N. Dean, 2008 A new purple fluorescent color marker for genetic studies in *Saccharomyces cerevisiae* and *Candida albicans*. *Genetics* 179: 705-710.
- Read, J. D., P. A. Colussi, M. B. Ganatra and C. H. Taron, 2007 Acetamide selection of *Kluyveromyces lactis* cells transformed with an integrative vector leads to high-frequency formation of multicopy strains. *Appl Environ Microbiol* 73: 5088-5096.
- Sheff, M. A., and K. S. Thorn, 2004 Optimized cassettes for fluorescent protein tagging in *Saccharomyces cerevisiae*. *Yeast* 21: 661-670.

## LIST OF TABLES

Tables S1 and S2 are included in this document. Tables S3-S9 are posted on FigShare.

### **Table S1. Plasmids used in this study**

### **Table S2. Yeast strains used in this study**

### **Table S3. RNA-Seq and CHIP-Seq data for all *S. cerevisiae* genes**

Raw data for all annotated *S. cerevisiae* genes.

### **Table S4. RNA-Seq and CHIP-Chip data for all *K. lactis* genes**

Raw data for all annotated *K. lactis* genes.

### **Table S5. ScSir2-regulated genes**

Each row represents a gene that was both associated with ScSir2 and upregulated at least two-fold in *sir2Δ hst1Δ* compared to wild-type *S. cerevisiae*. The KISir2-regulated column indicates whether the *K. lactis* ortholog is regulated by KISir2 based on both RNA-Seq datasets (12&16) or just the newer dataset (2016). The Ellahi column indicates whether the gene was identified by (ELLAHI *et al.* 2015) as SIR-regulated.

### **Table S6. ScHst1-regulated genes**

Each row represents a gene that was both associated with ScHst1 and upregulated at least two-fold in *sir2Δ hst1Δ* compared to wild-type *S. cerevisiae*. The KISir2-regulated column indicates whether the *K. lactis* ortholog is regulated by KISir2 based on both RNA-Seq datasets (12&16) or just the older dataset (2012). The Bedalov column indicates whether the gene was identified by (BEDALOV *et al.* 2003) as Hst1-regulated. The McCord columns indicate whether the gene was identified by (MCCORD *et al.* 2003) as Hst1- or Sum1-regulated. The Borde and Friedlander columns indicate whether the gene was increased during sporulation in two expression studies (FRIEDLANDER *et al.* 2006; BORDE *et al.* 2009). The categories and subcategories were developed manually based on GO terms and functional information about each gene.

### **Table S7. KISir2-regulated genes identified using 2016 RNA-Seq data**

Each row represents a gene that was both associated with KISir2 and upregulated in the 2016 dataset at least two-fold in *sir2Δ* compared to wild-type *K. lactis*. The *S. cerevisiae* orthologs were determined through a reciprocal BLASTP procedure followed by manual refinement, as described in the methods. For genes whose top *S. cerevisiae* BLASTP hit was more similar to another *K. lactis* gene, no *S. cerevisiae* ortholog is given. Instead, the description indicates that the gene is related to its top hit. The 2012 column indicates whether the gene was also induced in the 2012 RNA-Seq dataset. The categories and subcategories were developed manually based on GO terms and functional information about each gene and its *S. cerevisiae* ortholog.

### **Table S8. KISir2-regulated genes identified using 2012 RNA-Seq data**

Each row represents a gene that was both associated with KISir2 and upregulated in the 2012 dataset at least two-fold in *sir2Δ* compared to wild-type *K. lactis*. Genes that were also upregulated in the 2016 dataset are excluded from this list and can be found in Table S7. Columns are as described for Table S7.

### **Table S9. RNA-Seq and CHIP-Seq data for metabolic genes**

This table is the basis for Figure 3 and includes all *S. cerevisiae* genes known to act in the each pathway included in the figure. For each gene and its *K. lactis* ortholog, data are provided for the association with ScSir2, ScHst1, and KISir2 and the expression change in deletion compared to wild-type cells.

**Table S1**

| <b>Plasmid</b>    | <b>Description</b>                                  | <b>Source</b>                 |
|-------------------|-----------------------------------------------------|-------------------------------|
| pAGT100           | NatMX                                               | Kaufmann and Philippsen, 2009 |
| pCUG6             | KanMX flanked by LoxP                               | Pribylova et al., 2007        |
| pFA6a-KanMX       | KanMX                                               | Bahler et al., 1998           |
| pGBN19            | <i>KILAC4</i> integrating vector                    | Read et al., 2007             |
| pJJ958            | Cre Recombinase                                     | Heinisch et al., 2010         |
| pJJH955L          | <i>LEU2</i> flanked by LoxP                         | Heinisch et al., 2010         |
| pKT128            | yEGFP                                               | Sheff and Thorn, 2004         |
| yEpGAP-cherry-MCS | yEmRFP                                              | Keppler-Ross et al., 2008     |
| pLR522            | 3x-HA tag and <i>URA3</i>                           | Hanner and Rusche, 2017       |
| pLR730            | <i>KISIR2</i>                                       | Froyd and Rusche, 2011        |
| pLR809            | <i>sir2Δ::NatMX</i> cassette<br>pGBN19 lacking MFα1 | this study                    |
| pLR1076           | leader                                              | this study                    |
| pLR1085           | yEmRFP in pGBN19                                    | this study                    |
| pLR1087           | yEGFP in pGBN19                                     | this study                    |



**Table S2*****K. lactis* strains**

| <b>Strain</b> | <b>Genotype</b>                                                                                                                                                                                                                                                                                         | <b>Source</b>               |
|---------------|---------------------------------------------------------------------------------------------------------------------------------------------------------------------------------------------------------------------------------------------------------------------------------------------------------|-----------------------------|
| CK57-7A       | <i>MAT<math>\alpha</math> uraA1 ade1 sir2::URA3</i>                                                                                                                                                                                                                                                     | Chen and Clark-Walker, 1994 |
| CK213-4c      | <i>MAT<math>\alpha</math> leu2 lysA1 metA1 trp1 uraA1</i>                                                                                                                                                                                                                                               | Kegel et al., 2006          |
| Os334         | <i>MAT<math>\alpha</math> his3::loxP leu2 ura3</i>                                                                                                                                                                                                                                                      | Heinisch et al., 2010       |
| Os335         | <i>MAT<math>\alpha</math> ade2::loxP leu2 ura3</i>                                                                                                                                                                                                                                                      | Heinisch et al., 2010       |
| SAY538        | <i>MAT<math>\alpha</math> hml <math>\Delta</math>p nej1<math>\Delta</math>::LEU2 ade1 leu2 metA1 trp1 uraA1</i>                                                                                                                                                                                         | Barsoum et al., 2010        |
| LRY1946       | <i>MAT<math>\alpha</math> sir4<math>\Delta</math>::URA3 nej1<math>\Delta</math>::LEU2 ade1 leu2 trp1 uraA1</i>                                                                                                                                                                                          | Hickman and Rusche, 2009    |
| LRY2021       | <i>MAT<math>\alpha</math> SIR2::HA-NatMX hml <math>\Delta</math>p nej1<math>\Delta</math>::LEU2 leu2 metA1 trp1 uraA</i>                                                                                                                                                                                | This study                  |
| LRY2022       | <i>MAT<math>\alpha</math> / <math>\alpha</math> SIR2::HA-NatMX nej1<math>\Delta</math>::LEU2 leu2 metA1 trp1 uraA1</i>                                                                                                                                                                                  | This study                  |
| LRY2835       | <i>MAT<math>\alpha</math> hml<math>\Delta</math>::loxP hmra<math>\Delta</math>::loxP his3::loxP leu2 ura3</i>                                                                                                                                                                                           | This study                  |
| LRY2849       | <i>MAT<math>\alpha</math> sir2<math>\Delta</math>::NatMX hml<math>\Delta</math>::loxP hmra<math>\Delta</math>::loxP his3::loxP leu2 ura3</i>                                                                                                                                                            | This study                  |
| LRY2850       | <i>MAT<math>\alpha</math> sir2<math>\Delta</math>::NatMX hml<math>\Delta</math>::loxP hmra<math>\Delta</math>::loxP his3::loxP leu2 ura3</i>                                                                                                                                                            | This study                  |
| LRY2992       | <i>MAT<math>\alpha</math> hml<math>\Delta</math>::loxP hmra<math>\Delta</math>::loxP his3::loxP leu2 ura3</i>                                                                                                                                                                                           | This study                  |
| LRY2993       | <i>MAT<math>\alpha</math> sir2<math>\Delta</math>::NatMX hml<math>\Delta</math>::loxP hmra<math>\Delta</math>::loxP his3::loxP leu2 ura3</i>                                                                                                                                                            | This study                  |
| LRY3027       | <i>MAT<math>\alpha</math> hml<math>\Delta</math>::loxP hmra<math>\Delta</math>::loxP</i>                                                                                                                                                                                                                | This study                  |
| LRY3028       | <i>MAT<math>\alpha</math> sir2<math>\Delta</math>::NatMX hml<math>\Delta</math>::loxP hmra<math>\Delta</math>::loxP</i><br><i>MAT<math>\alpha</math> / MAT<math>\alpha</math> hml<math>\Delta</math>::loxP/hml<math>\Delta</math>::loxP hmra<math>\Delta</math>::loxP/hmra<math>\Delta</math>::loxP</i> | This study                  |
| LRY3019       | <i>ura3/URA3 LEU2/leu2</i><br><i>MAT<math>\alpha</math> / MAT<math>\alpha</math> hml<math>\Delta</math>::loxP/hml<math>\Delta</math>::loxP hmra<math>\Delta</math>::loxP/hmra<math>\Delta</math>::loxP</i>                                                                                              | This study                  |
| LRY3029       | <i>ura3/URA3 LEU2/leu2</i><br><i>MAT<math>\alpha</math> / MAT<math>\alpha</math> hml<math>\Delta</math>::loxP/hml<math>\Delta</math>::loxP hmra<math>\Delta</math>::loxP/hmra<math>\Delta</math>::loxP</i>                                                                                              | This study                  |
| LRY3030       | <i>ura3/URA3 LEU2/leu2</i><br><i>MAT<math>\alpha</math> / MAT<math>\alpha</math> hml<math>\Delta</math>::loxP/hml<math>\Delta</math>::loxP hmra<math>\Delta</math>::loxP/hmra<math>\Delta</math>::loxP</i>                                                                                              | This study                  |
| LRY3031       | <i>ura3/URA3 LEU2/leu2</i><br><i>MAT<math>\alpha</math> / MAT<math>\alpha</math> sir2<math>\Delta</math>::NatMX/sir2<math>\Delta</math>::NatMX hml<math>\Delta</math>::loxP/hml<math>\Delta</math>::loxP</i>                                                                                            | This study                  |
| LRY3020       | <i>hmra<math>\Delta</math>::loxP/hmra<math>\Delta</math>::loxP ura3/URA3 LEU2/leu2</i><br><i>MAT<math>\alpha</math> / MAT<math>\alpha</math> sir2<math>\Delta</math>::NatMX/sir2<math>\Delta</math>::NatMX hml<math>\Delta</math>::loxP/hml<math>\Delta</math>::loxP</i>                                | This study                  |
| LRY3032       | <i>hmra<math>\Delta</math>::loxP/hmra<math>\Delta</math>::loxP ura3/URA3 LEU2/leu2</i><br><i>MAT<math>\alpha</math> / MAT<math>\alpha</math> sir2<math>\Delta</math>::NatMX/sir2<math>\Delta</math>::NatMX hml<math>\Delta</math>::loxP/hml<math>\Delta</math>::loxP</i>                                | This study                  |
| LRY3033       | <i>hmra<math>\Delta</math>::loxP/hmra<math>\Delta</math>::loxP ura3/URA3 LEU2/leu2</i><br><i>MAT<math>\alpha</math> / MAT<math>\alpha</math> sir2<math>\Delta</math>::NatMX/sir2<math>\Delta</math>::NatMX hml<math>\Delta</math>::loxP/hml<math>\Delta</math>::loxP</i>                                | This study                  |
| LRY3034       | <i>hmra<math>\Delta</math>::loxP/hmra<math>\Delta</math>::loxP ura3/URA3 LEU2/leu2</i>                                                                                                                                                                                                                  | This study                  |

|         |                                                                       |            |
|---------|-----------------------------------------------------------------------|------------|
| LRY3037 | <i>MAT a LAC4::mCherry hmlΔ::loxP hmraΔ::loxP</i>                     | This study |
| LRY3038 | <i>MAT a LAC4::mCherry hmlΔ::loxP hmraΔ::loxP</i>                     | This study |
| LRY3039 | <i>MAT a sir2Δ::NatMX LAC4::mCherry hmlΔ::loxP hmraΔ::loxP</i>        | This study |
| LRY3040 | <i>MAT a sir2Δ::NatMX LAC4::mCherry hmlΔ::loxP hmraΔ::loxP</i>        | This study |
| LRY3053 | <i>MAT α LAC4::yEGFP hmlΔ::loxP hmraΔ::loxP</i>                       | This study |
| LRY3054 | <i>MAT α LAC4::yEGFP hmlΔ::loxP hmraΔ::loxP</i>                       | This study |
| LRY3055 | <i>MAT α sir2Δ::NatMX LAC4::yEGFP hmlΔ::loxP hmraΔ::loxP</i>          | This study |
| LRY3056 | <i>MAT α sir2Δ::NatMX LAC4::yEGFP hmlΔ::loxP hmraΔ::loxP</i>          | This study |
| LRY3096 | <i>MAT a sir4Δ::URA3 hmlΔ::loxP hmraΔ::loxP his3::loxP leu2 ura3</i>  | This study |
| LRY3098 | <i>MAT a sum1Δ::KanMX hmlΔ::loxP hmraΔ::loxP his3::loxP leu2 ura3</i> | This study |

### ***S. cerevisiae* strains**

| <b>Strain</b> | <b>Genotype</b>                                                                                                          | <b>Source</b>            |
|---------------|--------------------------------------------------------------------------------------------------------------------------|--------------------------|
| W303-1b       | <i>MAT α ade2-1 can1-100 his3-11 leu2-3,112 trp1-1 ura3-1</i>                                                            | R. Rothstein             |
| LRY1009       | W303 <i>MAT α ADE2 lys2Δ</i>                                                                                             | Jasper Rine              |
| LPY4441       | W303 <i>MAT α hmlΔ::TRP1</i>                                                                                             | Stone et al., 2000       |
| LRY333        | W303 <i>MAT a hst1Δ::KanMX sir2Δ::TRP1 ADE2 lys2 Δ</i>                                                                   | Hickman and Rusche, 2007 |
| LRY558        | W303 <i>MAT α HST1::5HA-URA3</i>                                                                                         | Hickman and Rusche, 2007 |
| LRY1926       | W303 <i>MAT α hmr::rHMRa+EI SIR2::HA-URA3</i>                                                                            | This study               |
| LRY3093       | W303 <i>MAT α ADE2 lys2 Δ hmrΔ::URA3</i>                                                                                 | This study               |
| LRY3099       | W303 <i>MAT α ADE2 lys2Δ hmrΔ::URA3 hst1Δ::KanMX sir2Δ::TRP1</i>                                                         | This study               |
| LRY3101       | W303 <i>MAT a ADE2 hmlΔ::TRP1 hst1Δ::KanMX sir2Δ::TRP1</i>                                                               | This study               |
| LRY3104       | W303 <i>MAT a ADE2 hmlΔ::TRP1</i>                                                                                        | This study               |
| LRY3108       | W303 <i>MAT a /MAT α HMR/hmrΔ::URA3 hmlΔ::TRP1/HML α lys2Δ/LYS2</i>                                                      | This study               |
| LRY3109       | W303 <i>MAT a /MAT α HMR/hmrΔ::URA3 hmlΔ::TRP1/HML α lys2Δ/LYS2</i>                                                      | This study               |
| LRY3110       | W303 <i>MAT a /MAT α HMR/hmrΔ::URA3 hmlΔ::TRP1/HML α lys2Δ/LYS2</i>                                                      | This study               |
| LRY3111       | W303 <i>MAT a /MAT α HMR/hmrΔ::URA3 hmlΔ::TRP1/HML α lys2Δ/LYS2</i>                                                      | This study               |
| LRY3112       | W303 <i>MAT a /MAT α HMR a /hmrΔ::URA3 lys2Δ/LYS2 hmlΔ::TRP1/HML α hst1Δ::KanMX/hst1Δ::KanMX sir2Δ::TRP1/sir2Δ::TRP1</i> | This study               |
| LRY3113       | W303 <i>MAT a /MAT α HMR a /hmrΔ::URA3 lys2Δ/LYS2 hmlΔ::TRP1/HML α hst1Δ::KanMX/hst1Δ::KanMX sir2Δ::TRP1/sir2Δ::TRP1</i> | This study               |
| LRY3114       | W303 <i>MAT a /MAT α HMR a /hmrΔ::URA3 lys2Δ/LYS2 hmlΔ::TRP1/HML α hst1Δ::KanMX/hst1Δ::KanMX sir2Δ::TRP1/sir2Δ::TRP1</i> | This study               |
| LRY3115       | W303 <i>MAT a /MAT α HMR a /hmrΔ::URA3 lys2Δ/LYS2 hmlΔ::TRP1/HML α hst1Δ::KanMX/hst1Δ::KanMX sir2Δ::TRP1/sir2Δ::TRP1</i> | This study               |
